# Supplementary material for: A coordination driven ‘heat-set’ Zr-gel: efficient fluorophore probe for selective detection of Fe3+ and nitrofuran-based antibiotics and smart approach for UV protection
Source: Royal Society of Chemistry journal article supplement (doi:10.1039/d3sm00289f), 2023-01-01
Supplement: d3sm00289f1.pdf [file d3sm00289f1.pdf]

# Supporting Information (SI)

## **A Coordination Driven ‘heat-set’ Zr-Gel: Efficient Fluorophore Probe for Selective Detection of Fe<sup>3+</sup>, Nitrofurantoin based Antibiotics and Smart Approach towards UV Protection**

*Sumit Mondal<sup>†</sup>, and Debajit Sarma\*<sup>†</sup>*

<sup>†</sup>Department of Chemistry, Indian Institute of Technology Patna, Bihar 801106, India

\*E-mail: [debajit@iitp.ac.in](mailto:debajit@iitp.ac.in)

## Contents

|                                                                                                                                         |    |
|-----------------------------------------------------------------------------------------------------------------------------------------|----|
| <b>Methods:</b> .....                                                                                                                   | 3  |
| <b>Characterization:</b> .....                                                                                                          | 3  |
| <b>NMR data of the H<sub>3</sub>TATAB linker:</b> .....                                                                                 | 4  |
| <b>Synthesis, characterization of the metallogel and xerogel:</b> .....                                                                 | 5  |
| <b>Photophysical properties of the Zr-CPG xerogel:</b> .....                                                                            | 11 |
| <b>Quenching behaviour of Zr-CPG's luminescent peak upon addition of different metal ions (Figure S15a-S15l):</b> .....                 | 13 |
| <b>Fe<sup>3+</sup> sensing in presence of interference metal ions (Figure S17a-S17l):</b> .....                                         | 19 |
| <b>Recyclability test for Fe<sup>3+</sup> sensing:</b> .....                                                                            | 26 |
| <b>Fe<sup>3+</sup> sensing in physiological conditions:</b> .....                                                                       | 27 |
| <b>Quenching behaviour of Zr-CPG's characteristic luminescent peak upon addition of different antibiotics (Figure S22a-S22h):</b> ..... | 27 |
| <b>NFT sensing in presence of interference antibiotics (Figure S24a-S24f):</b> .....                                                    | 32 |
| <b>Recyclability test for NFT sensing:</b> .....                                                                                        | 35 |
| <b>Fluorescence kinetic study for NFT sensing:</b> .....                                                                                | 36 |
| <b>Comparison table of Fe<sup>3+</sup> and NFT sensing for Zr-CPG xerogel with other reported materials:</b> .....                      | 37 |
| <b>Fluorescence quenching mechanism explanation:</b> .....                                                                              | 38 |

## Methods:

### Time-resolved PL measurements:

Fitting either a single-exponential or a bi-exponential function to the ensuing lifetime decays is demonstrated by equation S1, where the reduced  $\chi^2$  is used to determine the virtue of the fitting.

$$I_t = A + \sum_{i=1}^n B_i \exp\left(-\frac{t}{\tau_i}\right) \dots\dots\dots \text{equation S1; where n is 1 or 2}$$

In order to determine the average lifetime, we employ the fitted parameters, which include the lifetime components  $\tau_i$ 's and their respective relative contributions,  $B_i$ 's, as shown in equation S2:

$$\tau_{avg} = \frac{\sum_{i=1}^n B_i \tau_i^2}{\sum_{i=1}^n B_i \tau_i} \dots\dots\dots \text{equation S2; where n is 1 or 2}$$

(Table S3).

### Characterization:

The Powder X-Ray Diffraction (PXRD) pattern was recorded using a PANalytical X'Pert Pro Diffractometer that ran at 45 mA and 40 kV with Cu K radiation. The  $^1\text{H}$  and  $^{13}\text{C}$  NMR spectra were performed using a Bruker Avance II 400 spectrometer. Using an SDT Q600 (TA Instruments) and a  $\text{N}_2$  gas flow rate of 100 mL/min, a thermogravimetric analysis (TGA) of the xerogel was carried out. The temperature was raised from room temperature to 800 °C at a rate of 10 °C min<sup>-1</sup>. The surface morphology of the xerogel was examined using a Field Emission Scanning Electron Microscope (FESEM; ZEISS GEMINISEM500 assembled with an energy-dispersive X-ray spectroscopy detector). The xerogel sample was examined using a transmission electron microscope (JEOL-JEM-F200) at a 200 kV potential. The FT-IR spectra of all the samples were recorded using an ATR sampling method on a PerkinElmer Spectrum 400 instrument. The rheological measurements were carried out using a Modular Compact Rheometer by Anton Paar (MCR 302). In order to determine the storage modulus ( $G'$ ) and loss modulus ( $G''$ ), the metallogel was scanned on a parallel plate with a 9-millimeter diameter while being subjected to 0.1% strain. All UV-Vis spectra were performed using a Shimadzu UV2500 spectrophotometer. Utilizing two-sided transparent square-faced quartz cuvettes, solution phase data from the instrument was taken (1 cm path-length). Solid-state UV-Vis spectra were collected on a JASCO V-650 spectrometer. Utilizing a Horiba Jobin Yvon Fluoromax-4 fluorescence spectrophotometer, photoluminescence (PL) spectra were acquired. In order to conduct the dispersed phase fluorescence investigation, a 4 mL four-faced transparent quartz cuvette was used. All the solution and dispersed phase photoluminescence spectra were measured using fresh Milli-Q water. The Edinburgh Instrument (model: lifeSpec II, U.K) of fluorescence spectrophotometer was used for Time-Resolved Photoluminescence (TRPL) analysis. The data was taken using a Hamamtsu MCP PMT (3809U) detector.

**NMR data of the H<sub>3</sub>TATAB linker:**

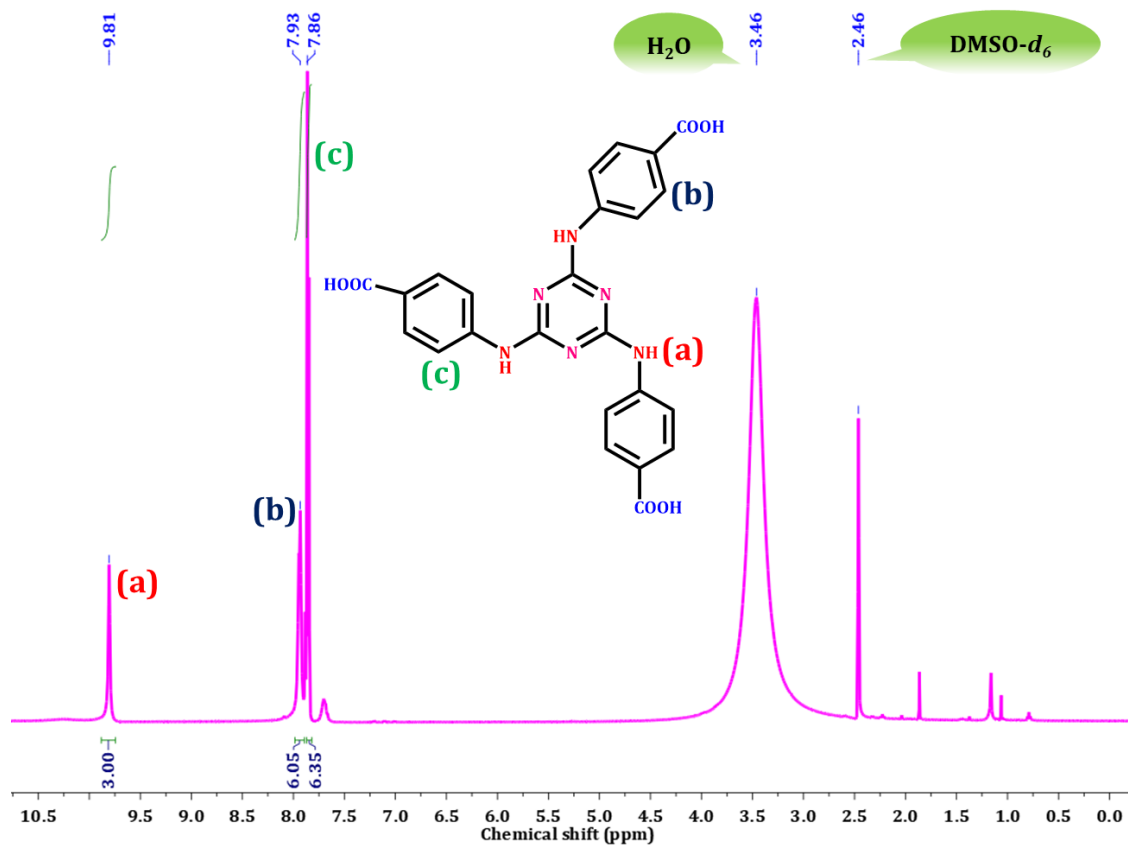

**Figure S1:** <sup>1</sup>H-NMR spectrum of the H<sub>3</sub>TATAB linker (400 MHz, in DMSO-*d*<sub>6</sub>).

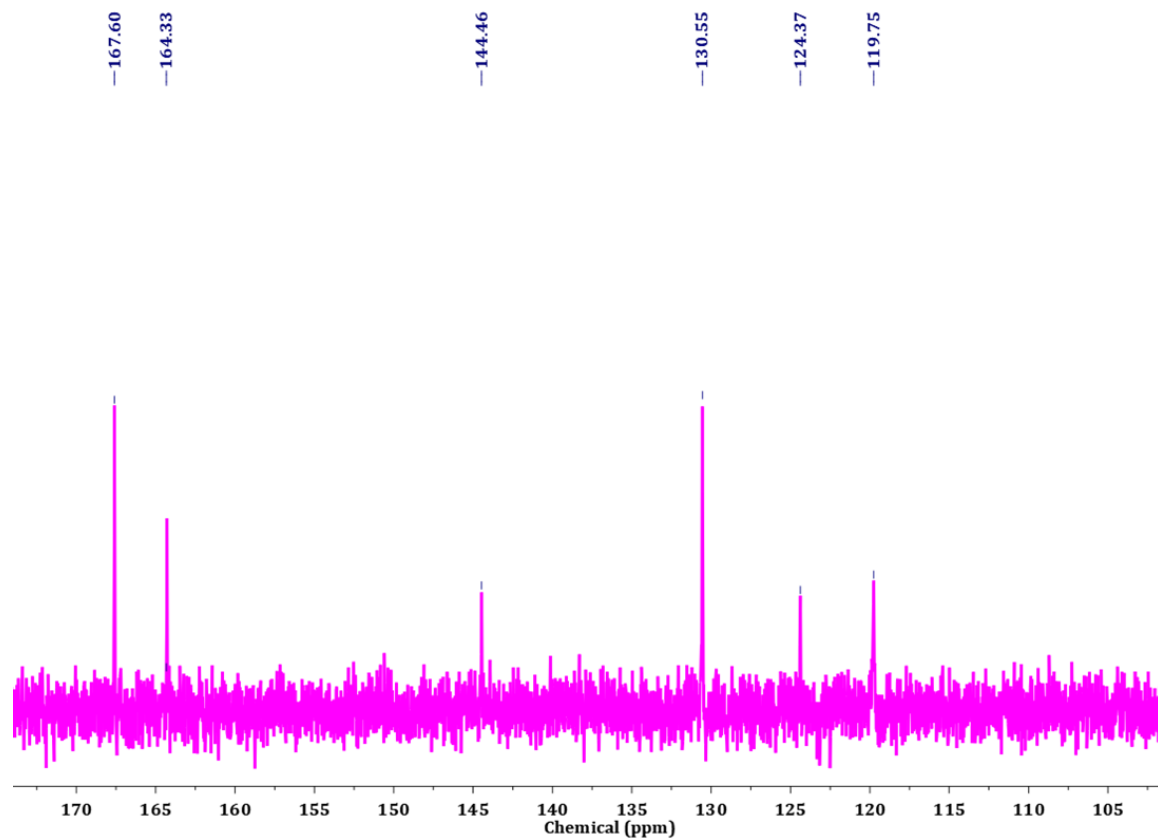

**Figure S2:** <sup>13</sup>C-NMR spectrum of the H<sub>3</sub>TATAB ligand (400 MHz, in DMSO-*d*<sub>6</sub>).

**Synthesis, characterization of the metallogel and xerogel:**

**Table S1: Gelation study in various solvent combinations**

| Sl. No. | Solvent used | Gelation ability     | Temperature | Image                                                                                 |
|---------|--------------|----------------------|-------------|---------------------------------------------------------------------------------------|
| 1.      | DMF/Water    | Gel formation happen | 90 °C       |    |
| 2.      | DMF/MeOH     | White precipitate    | 90 °C       |    |
| 3.      | DMF/EtOH     | Little turbidity     | 90 °C       |  |
| 4.      | DMSO/Water   | Weak gelation        | 90 °C       |  |
| 5.      | DMSO/ MeOH   | White precipitate    | 90 °C       |  |
| 6.      | DMSO/ EtOH   | Clear solution       | 90 °C       |  |

|    |            |                       |   |                                                                                     |
|----|------------|-----------------------|---|-------------------------------------------------------------------------------------|
| 7. | THF        | Linker is not soluble | - |  |
| 8. | Hexane     | Linker is not soluble | - |  |
| 9. | Chloroform | Linker is not soluble | - |  |

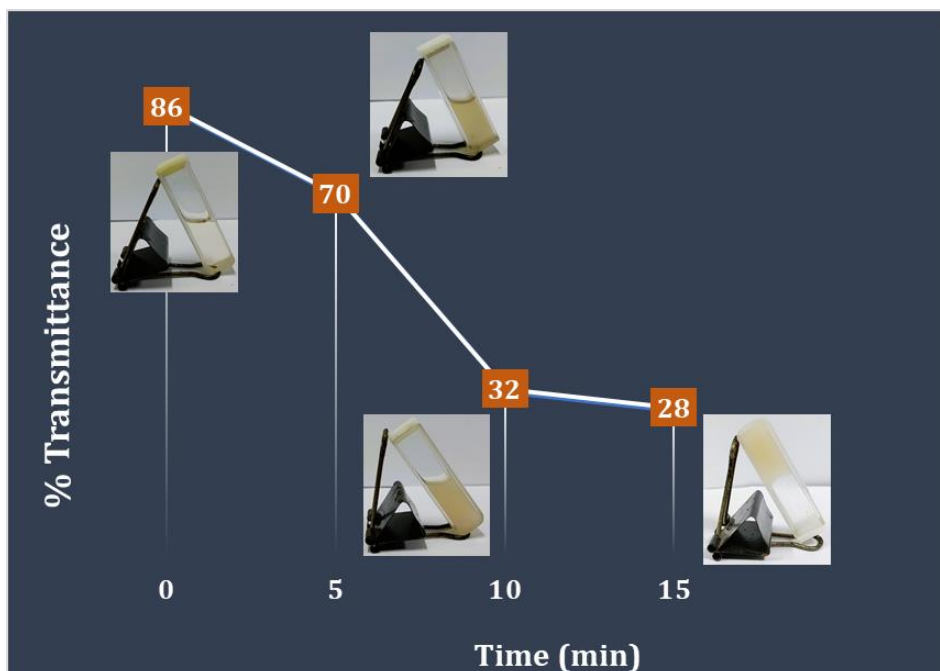

**Figure S3:** Turbidity measurements which correlates with naked eye test and transmittance (100 T% at 500 nm wavelength) at different time interval of the gelation process.

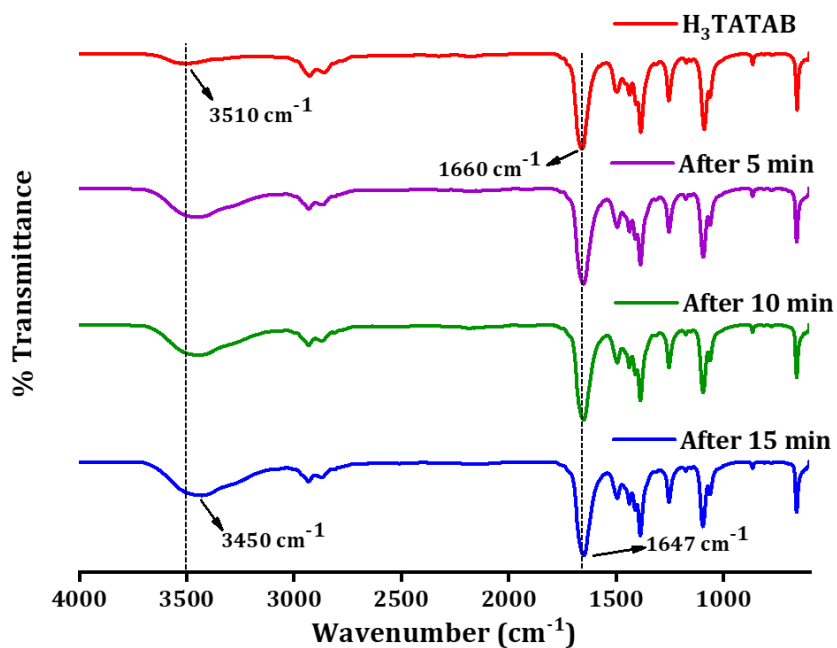

**Figure S4:** FT-IR analysis of the linker and different time interval gelation process.

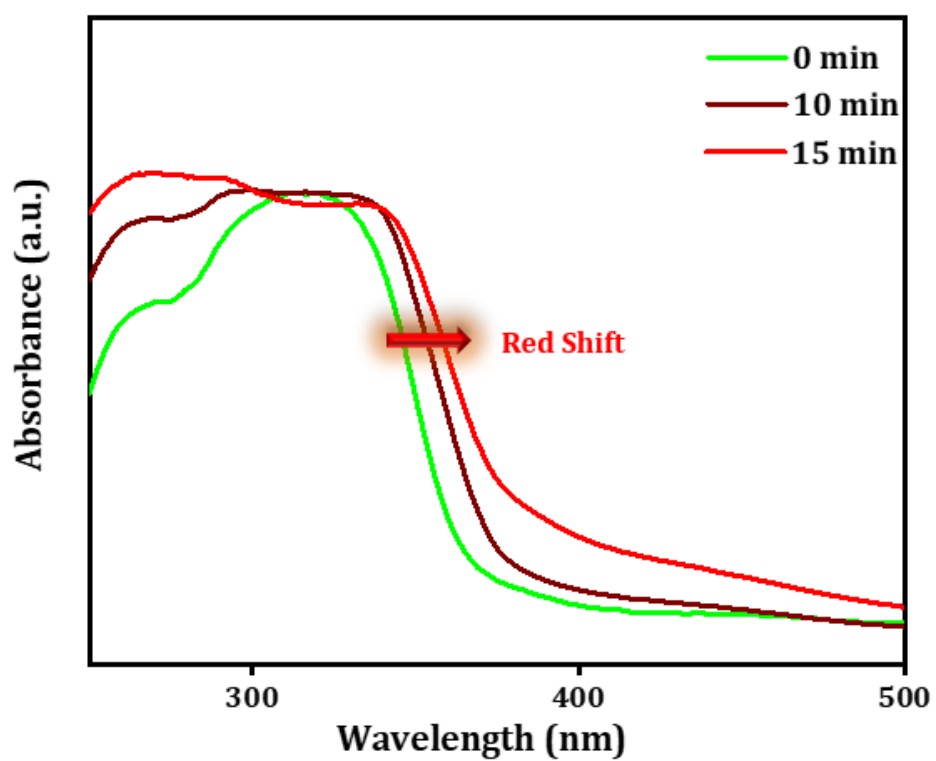

**Figure S5:** DRS spectra analysis of reaction mixtures (in different time interval for sol to gel transition).

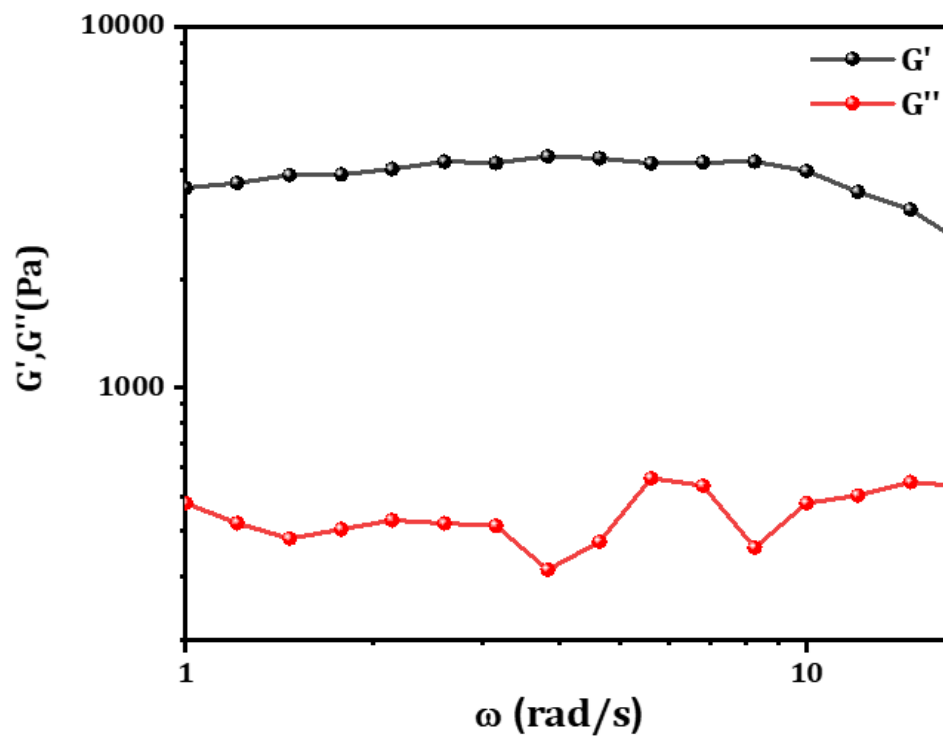

**Figure S6:** Dynamic angular frequency sweep vs. gain modulus ( $G'$ ) and loss modulus ( $G''$ ) of the Zr-CPG.



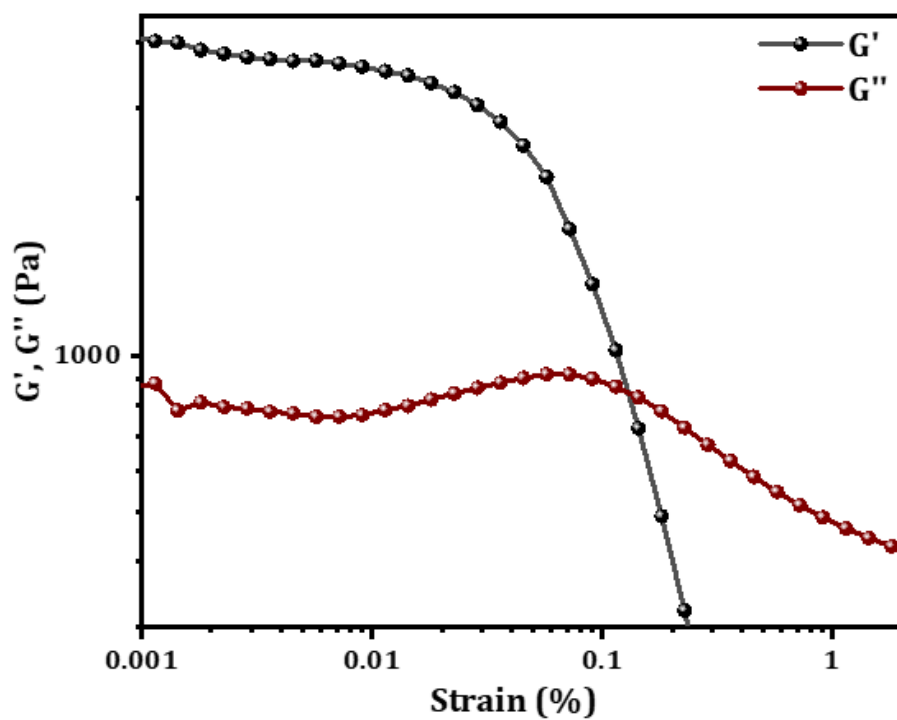

Figure S7: Dynamic Strain sweep vs. gain modulus ( $G'$ ) and loss modulus ( $G''$ ) of the Zr-CPG.

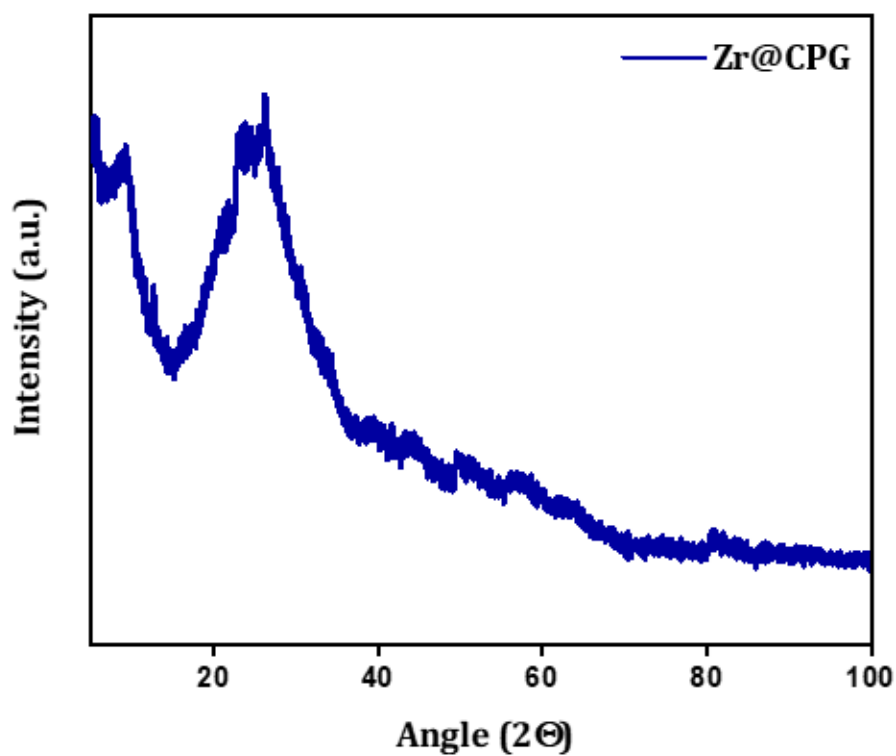

Figure S8: PXRD pattern of Zr-CPG xerogel.

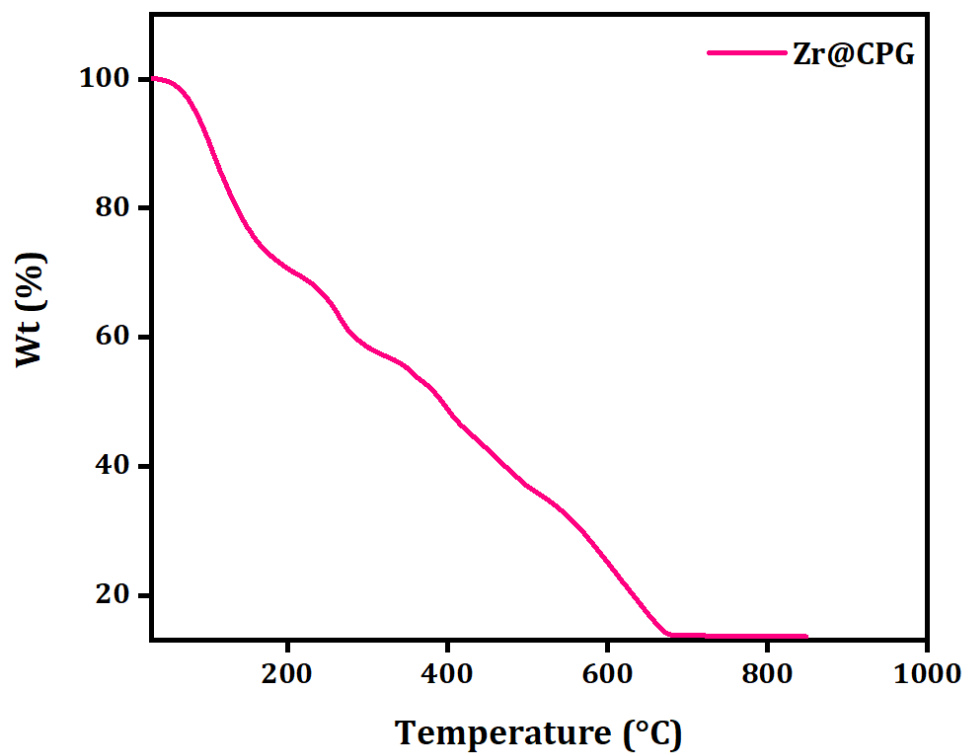

**Figure S9:** TGA analysis of Zr-CPG xerogel.

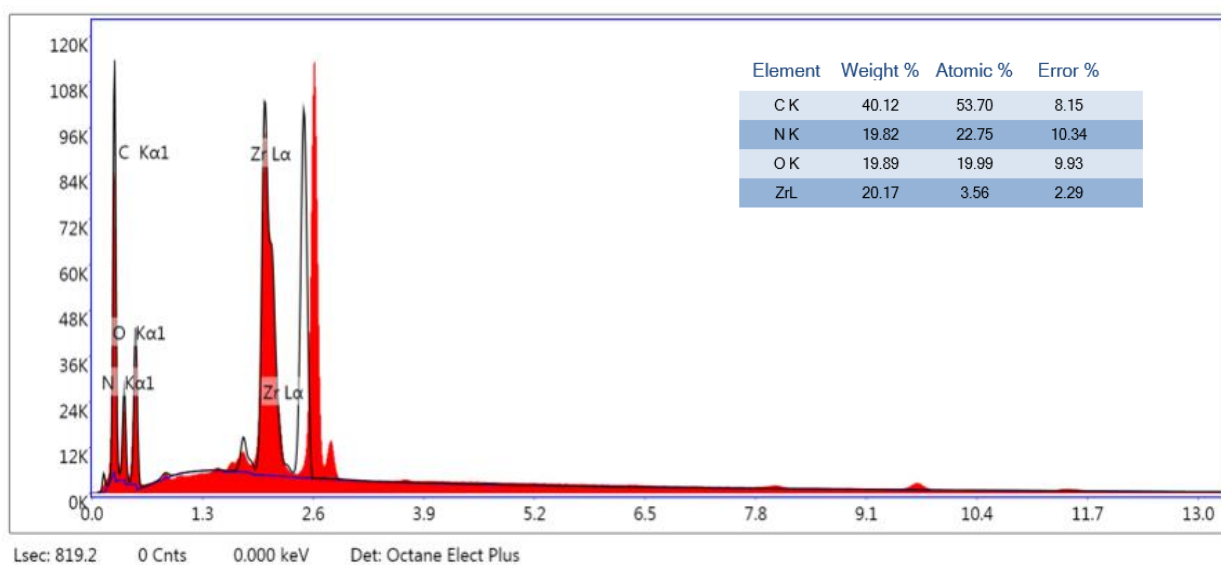

**Figure S10:** EDS analysis of the Zr-CPG xerogel with elemental dot mapping image.

### Photophysical properties of the Zr-CPG xerogel:

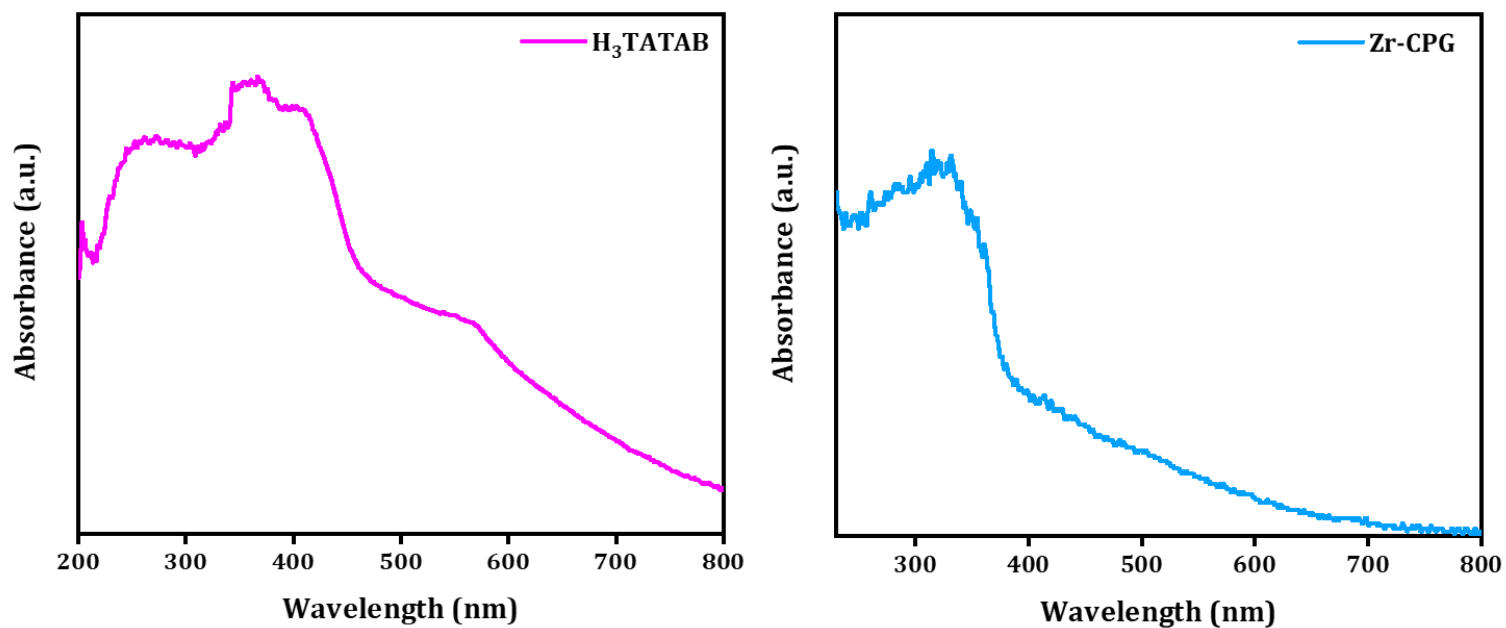

Figure S11: Solid state UV -Vis spectra of (a) linker (H<sub>3</sub>TATAB) and (b) Zr-CPG xerogel.

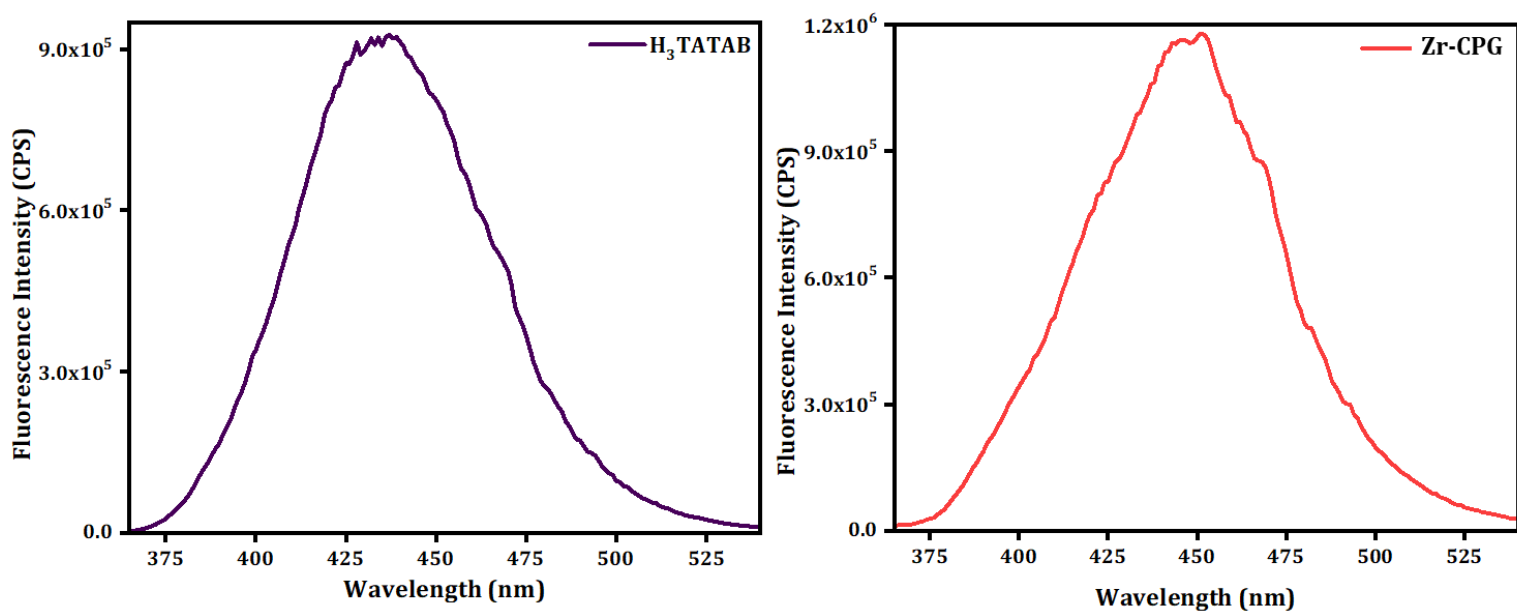

Figure S12: Solid state photoluminescence spectra of (a) linker (H<sub>3</sub>TATAB) and (b) Zr-CPG xerogel.

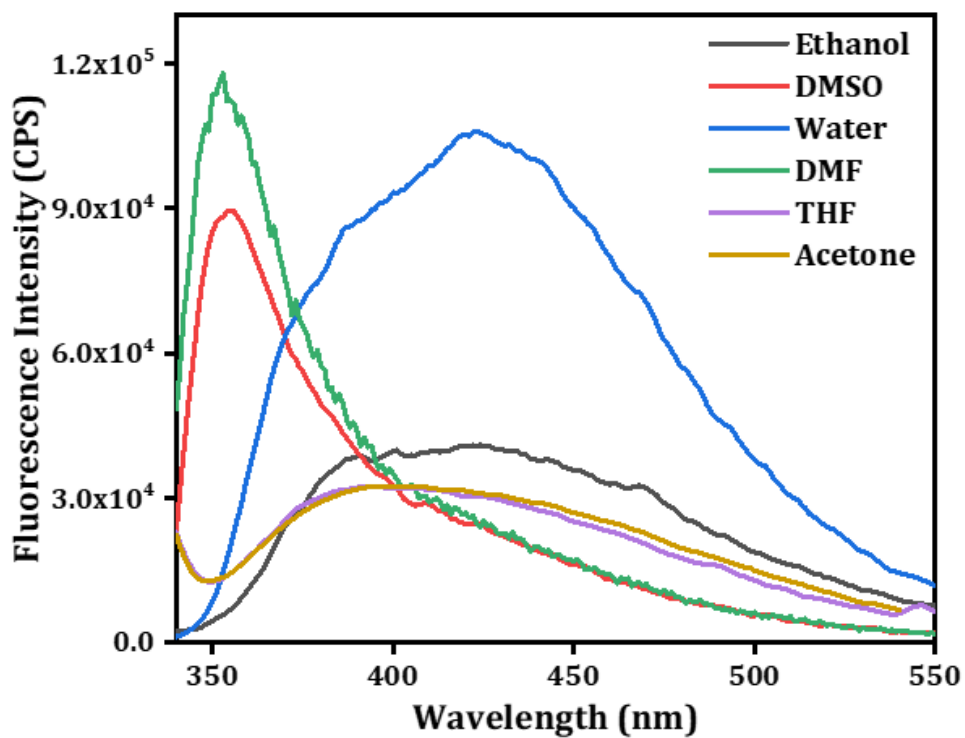

**Figure S13:** Solvent dependent photoluminescence study of the Zr-CPG xerogel.

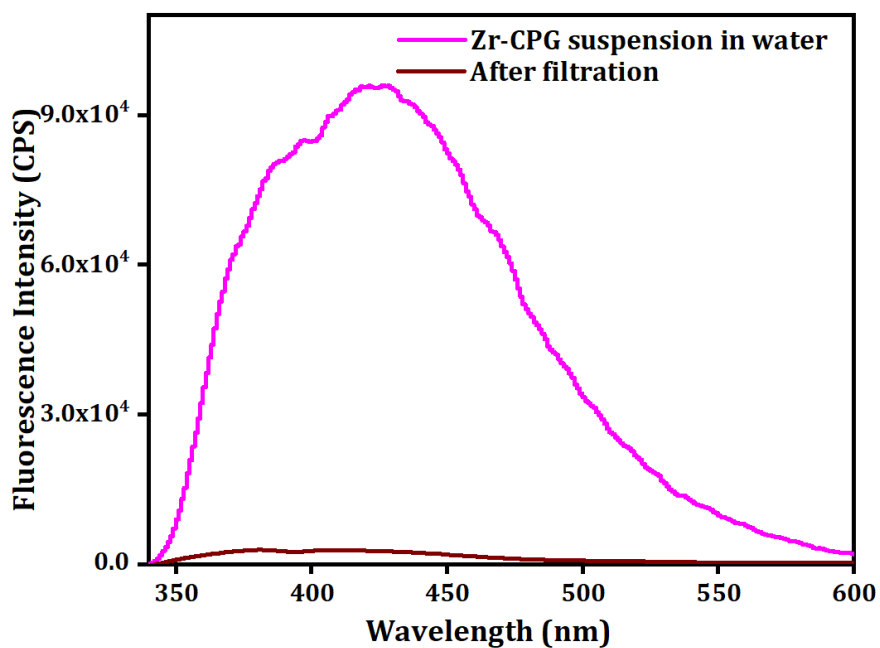

**Figure S14:** Leaching test for Zr-CPG xerogel suspension in water.

Quenching behaviour of Zr-CPG's luminescent peak upon addition of different metal ions (Figure S15a-S15l):

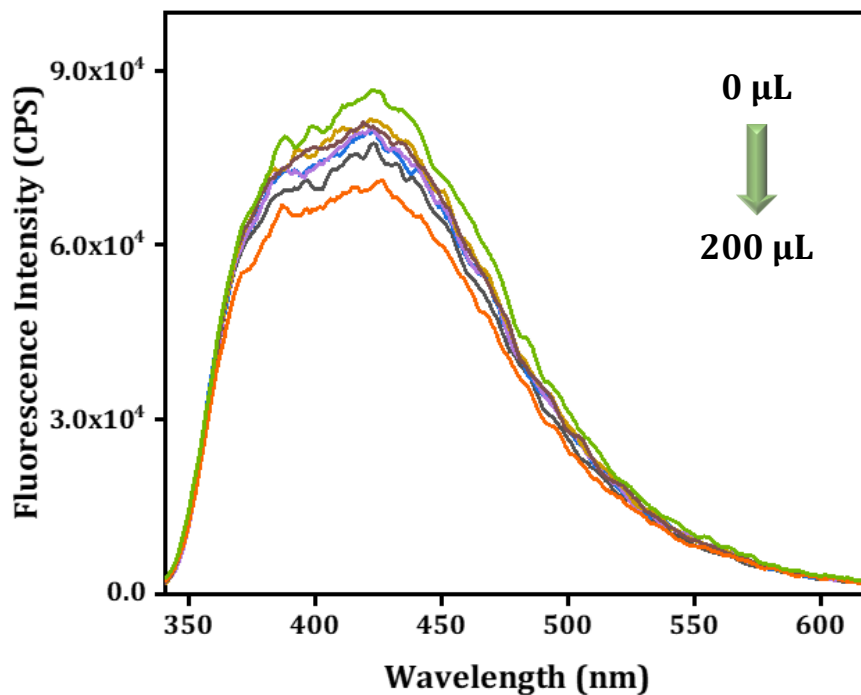

**Figure 15a:** Quenching of the luminescent peak of Zr-CPG xerogel upon addition of Fe<sup>2+</sup> (10 mM, up to 200 μL).

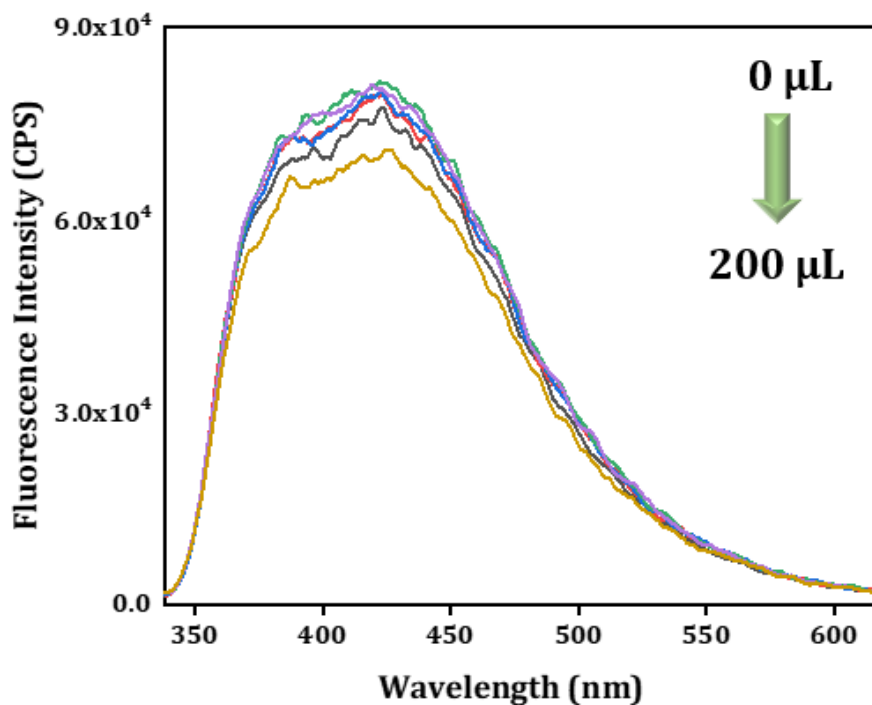

**Figure S15b:** Quenching of the luminescent peak of Zr-CPG xerogel upon addition of Zn<sup>2+</sup> (10 mM, up to 200 μL).

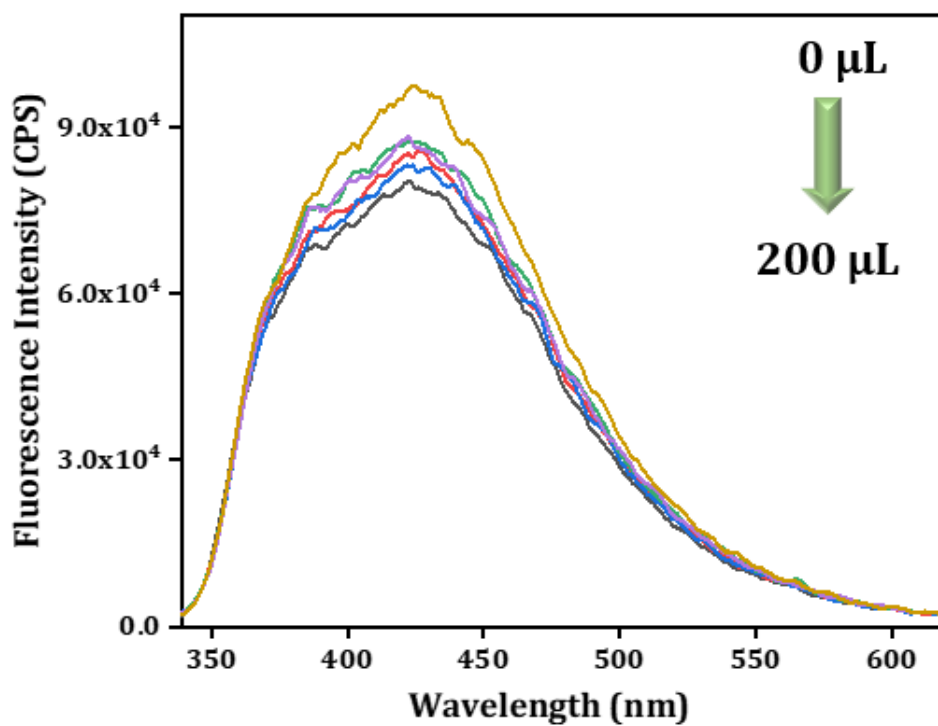

**Figure S15c:** Quenching of the luminescent peak of Zr-CPG xerogel upon addition of  $\text{Na}^+$  (10 mM, up to 200  $\mu\text{L}$ ).

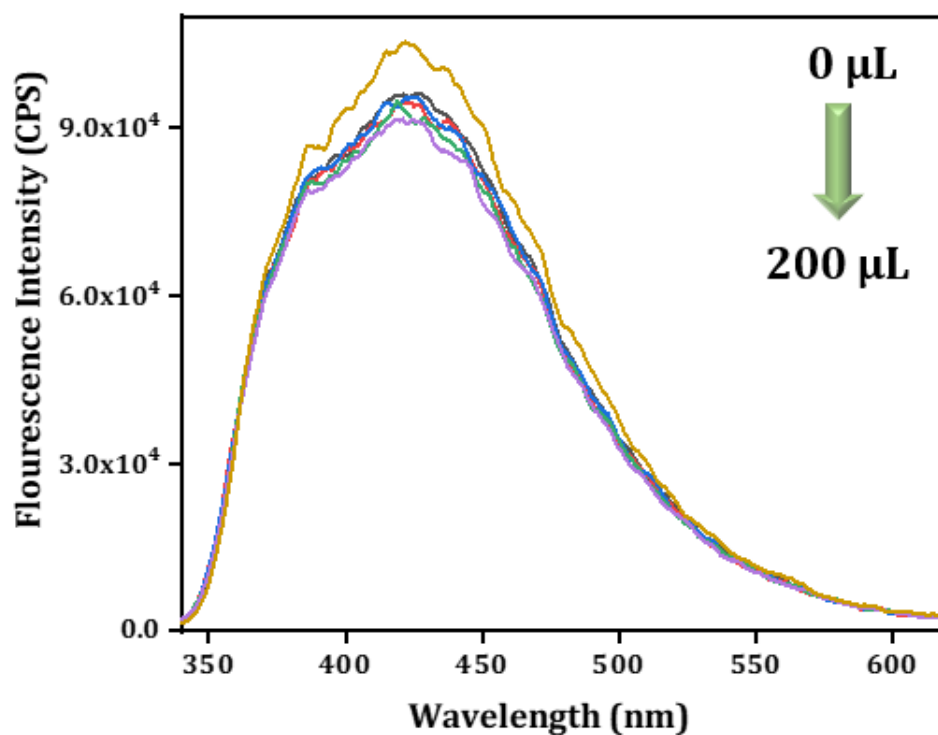

**Figure S15d:** Quenching of the luminescent peak of Zr-CPG xerogel upon addition of  $\text{Al}^{3+}$  (10 mM, up to 200  $\mu\text{L}$ ).

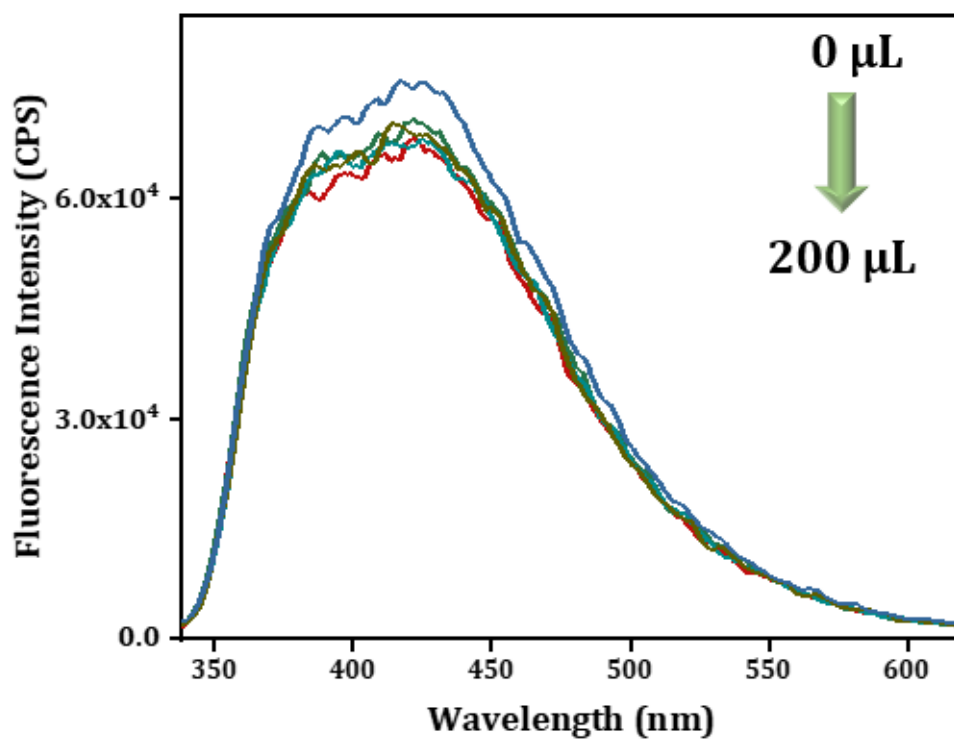

**Figure S15e:** Quenching of the luminescent peak of Zr-CPG xerogel upon addition of  $\text{Co}^{2+}$  (10 mM, up to 200  $\mu\text{L}$ ).

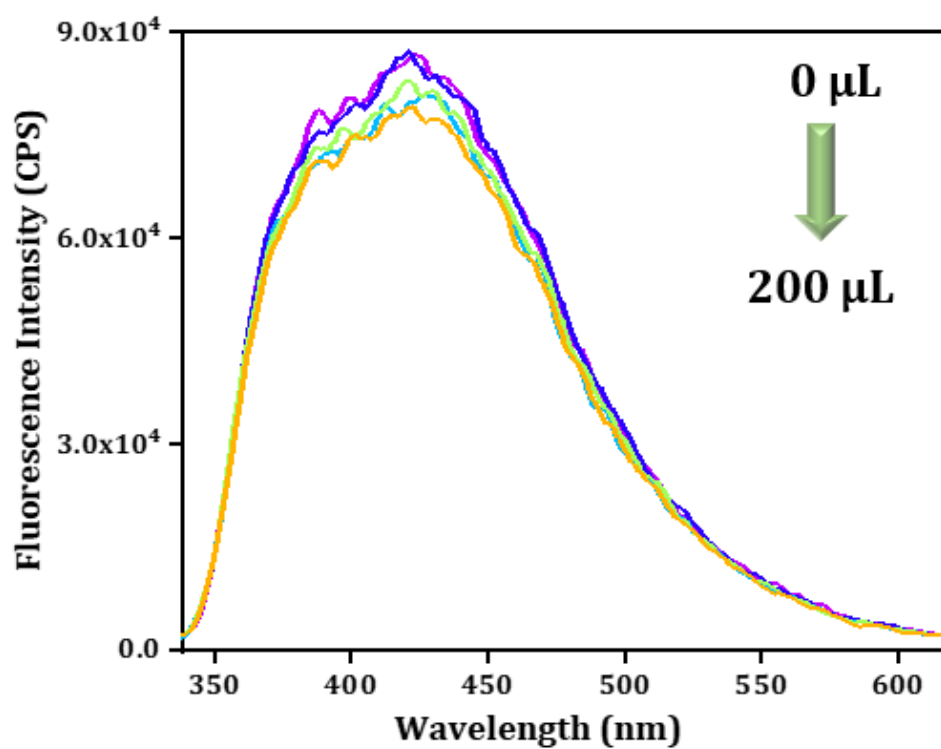

**Figure S15f:** Quenching of the luminescent peak of Zr-CPG xerogel upon addition of  $\text{Cu}^{2+}$  (10 mM, up to 200  $\mu\text{L}$ ).

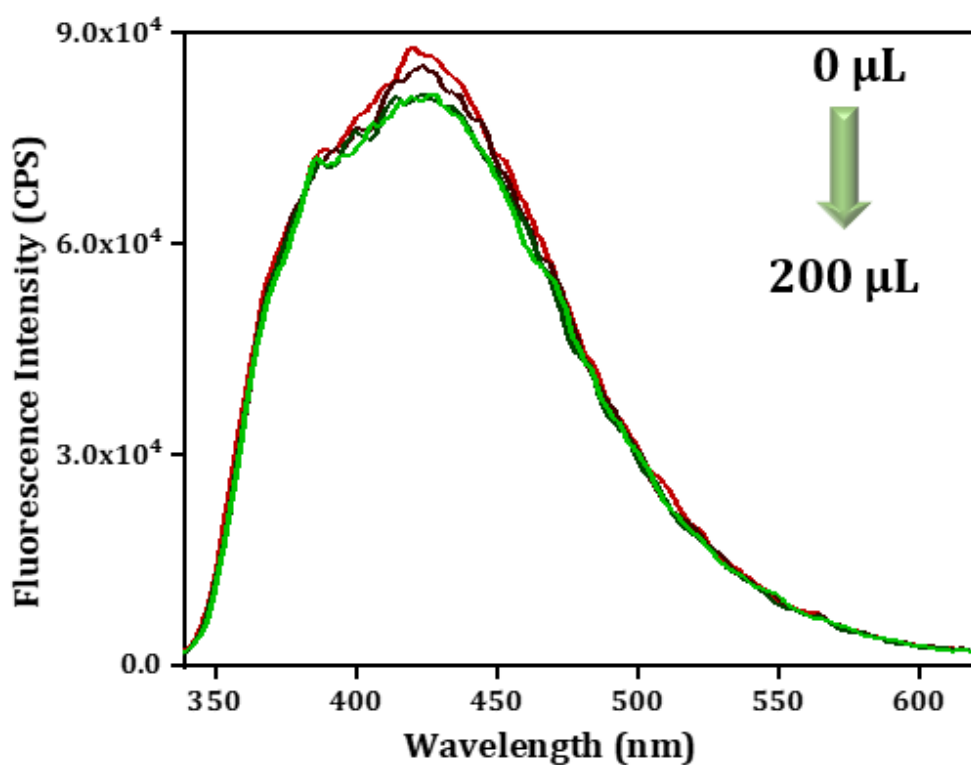

**Figure S15g:** Quenching of the luminescent peak of Zr-CPG xerogel upon addition of  $\text{Cr}^{3+}$  (10 mM, up to 200  $\mu\text{L}$ ).

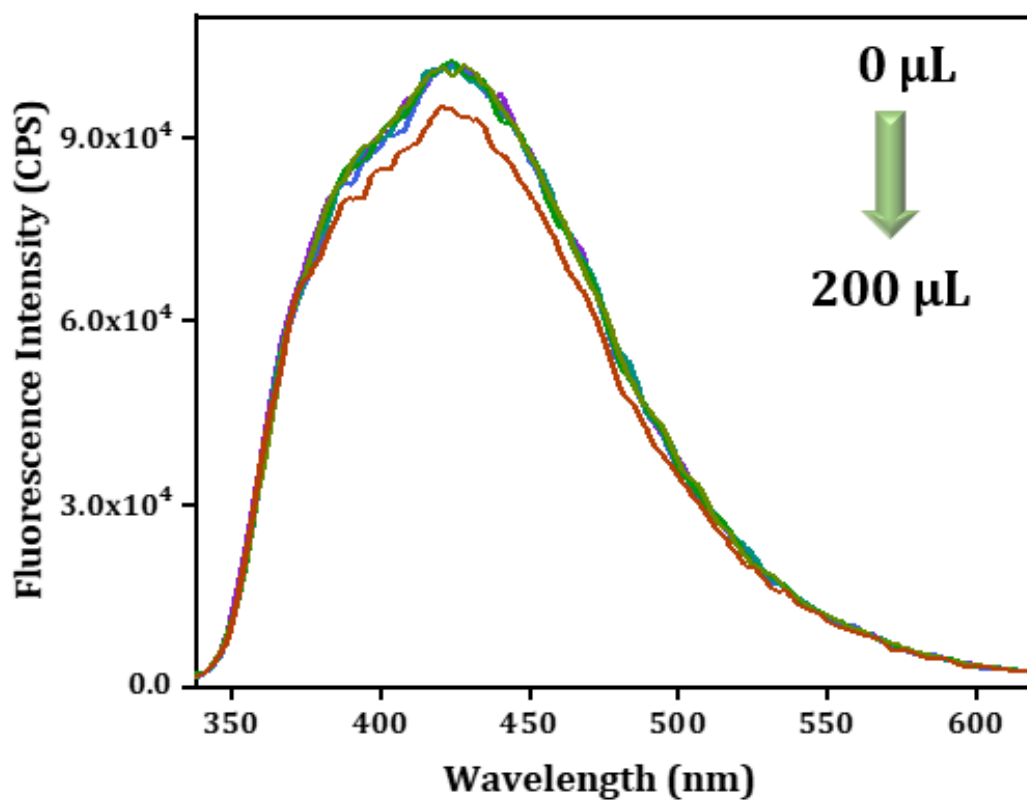

**Figure S15h:** Quenching of the luminescent peak of Zr-CPG xerogel upon addition of  $\text{Hg}^{2+}$  (10 mM, up to 200  $\mu\text{L}$ ).



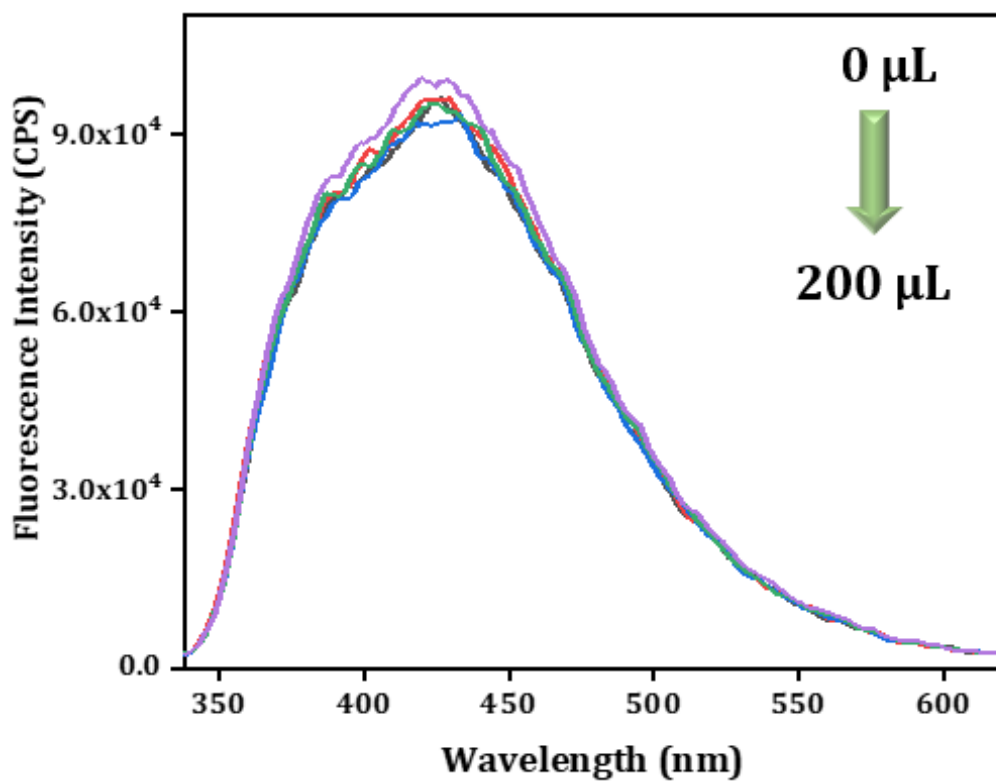

**Figure S15i:** Quenching of the luminescent peak of Zr-CPG xerogel upon addition of K<sup>+</sup> (10 mM, up to 200 μL).

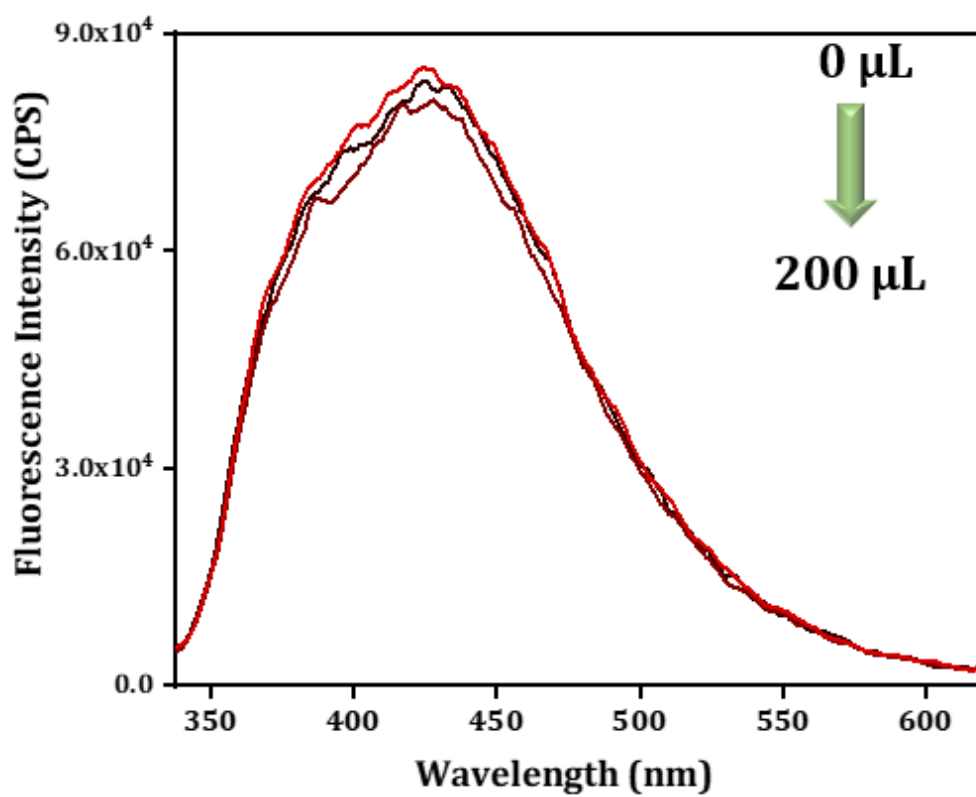

**Figure S15j:** Quenching of the luminescent peak of Zr-CPG xerogel upon addition of Ca<sup>2+</sup> (10 mM, up to 200 μL).

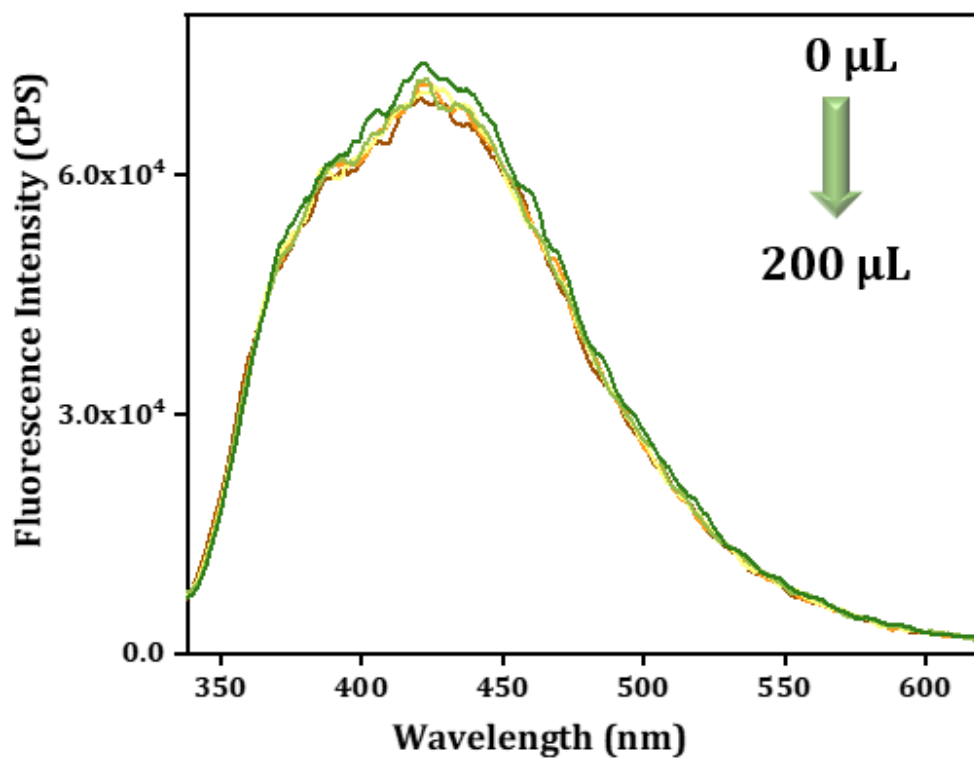

**Figure S15k:** Quenching of the luminescent peak of Zr-CPG xerogel upon addition of Ni<sup>2+</sup> (10 mM, up to 200 μL).

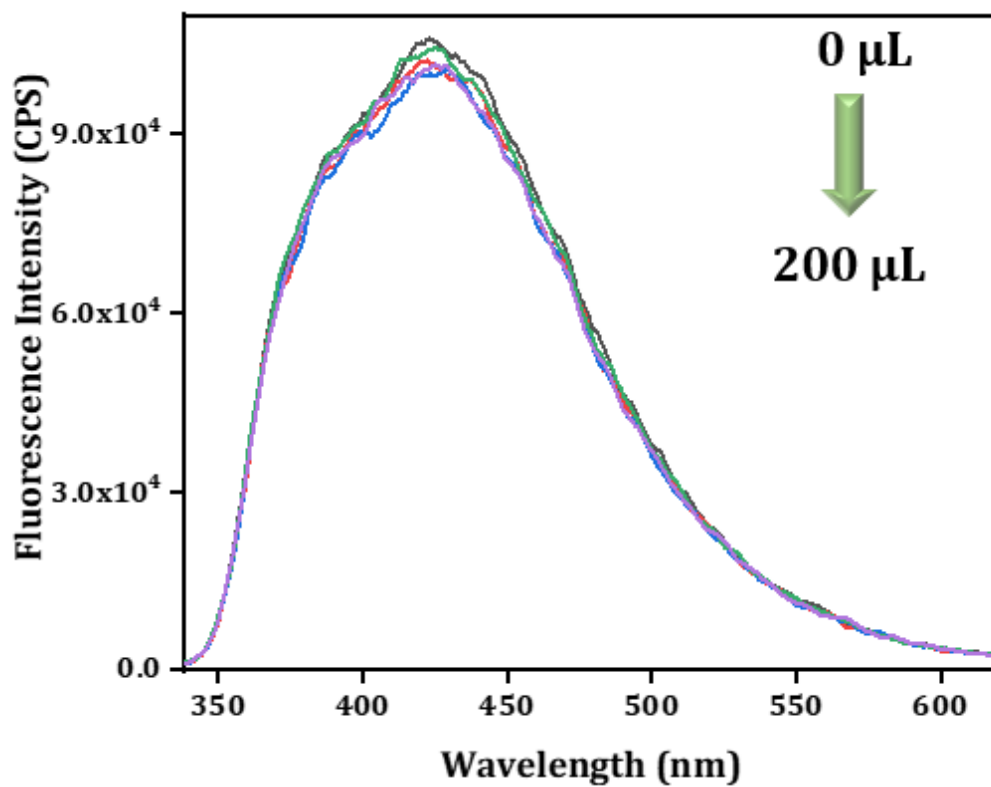

**Figure S15l:** Quenching of the luminescent peak of Zr-CPG xerogel upon addition of Cd<sup>2+</sup> (10 mM, up to 200 μL).

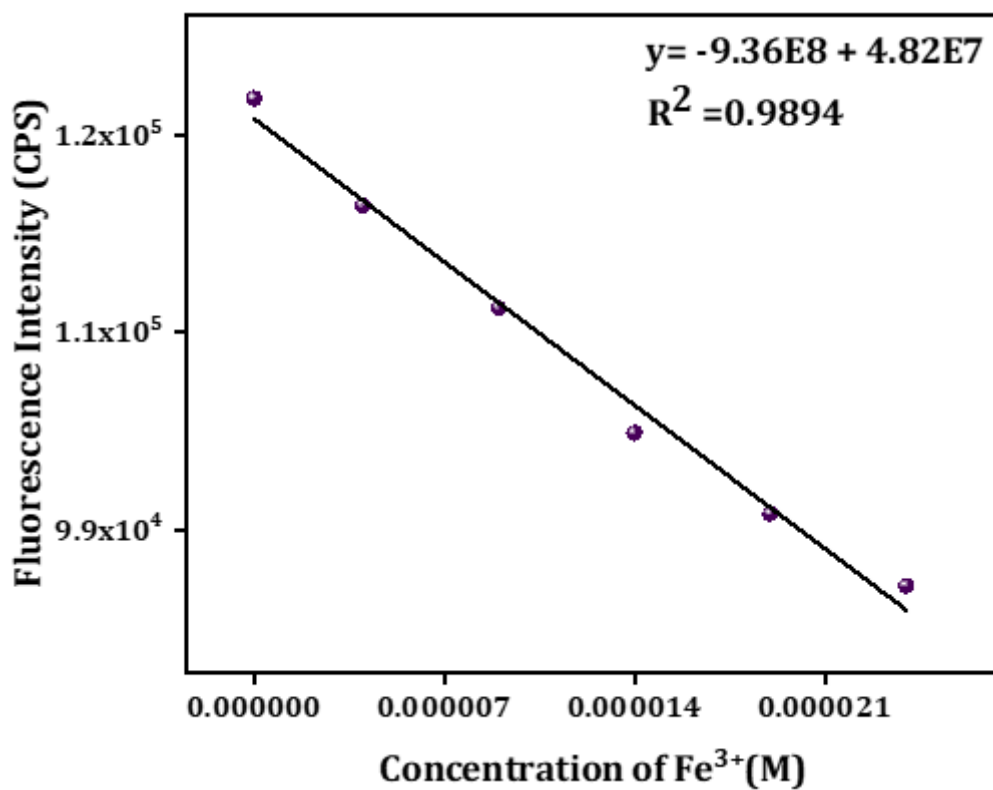

**Figure S16:** Fluorescence intensity changes of Zr-CPG xerogel with a function of Fe<sup>3+</sup> concentration.

**Fe<sup>3+</sup> sensing in presence of interference metal ions (Figure S17a-S17l):**

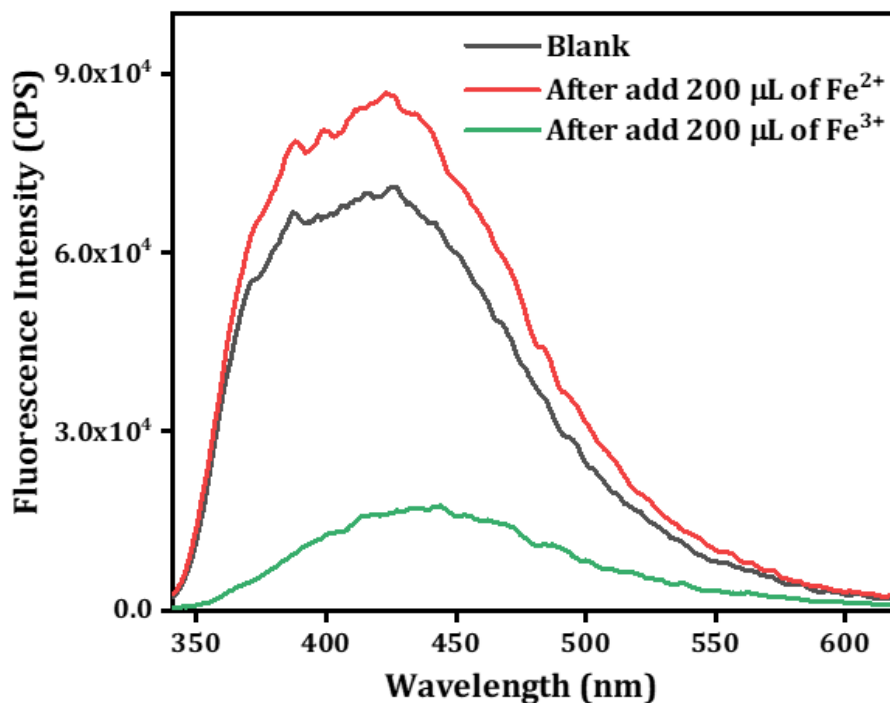

**Figure 17a:** Quenching behaviour of Zr-CPG xerogel characteristic peak after adding 10 mM solution of Fe<sup>2+</sup> followed by Fe<sup>3+</sup> in water.

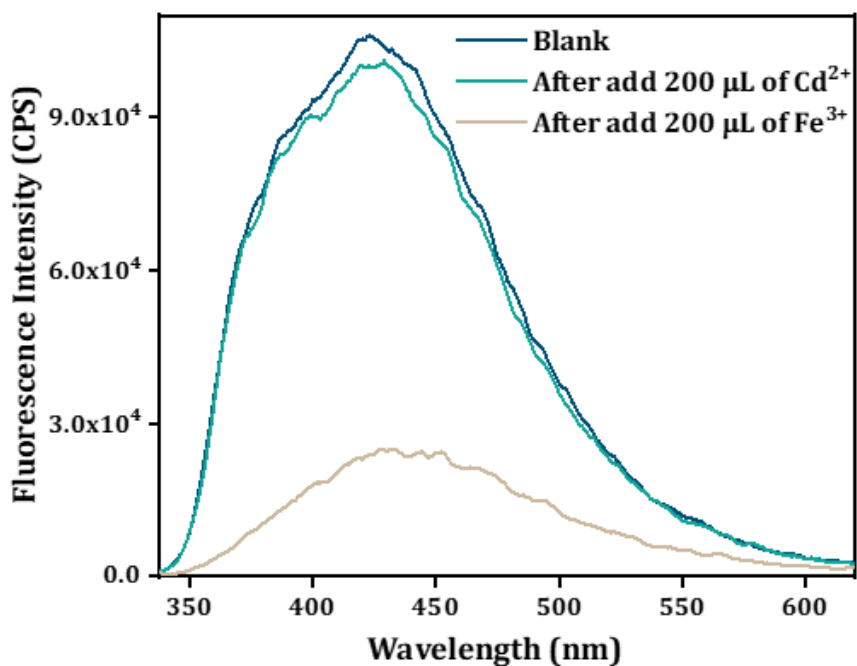

**Figure S17b:** Quenching behaviour of Zr-CPG xerogel characteristic peak after adding 10 mM solution of Cd<sup>2+</sup> followed by Fe<sup>3+</sup> in water.

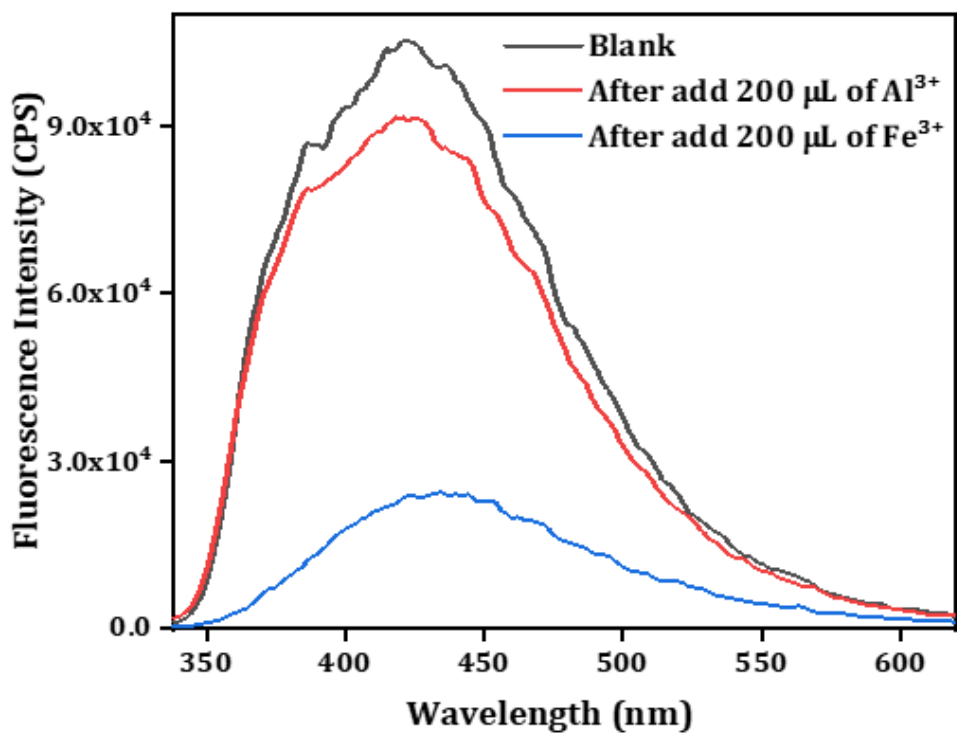

**Figure S17c:** Quenching behaviour of Zr-CPG xerogel characteristic peak after adding 10 mM solution of Al<sup>3+</sup> followed by Fe<sup>3+</sup> in water.

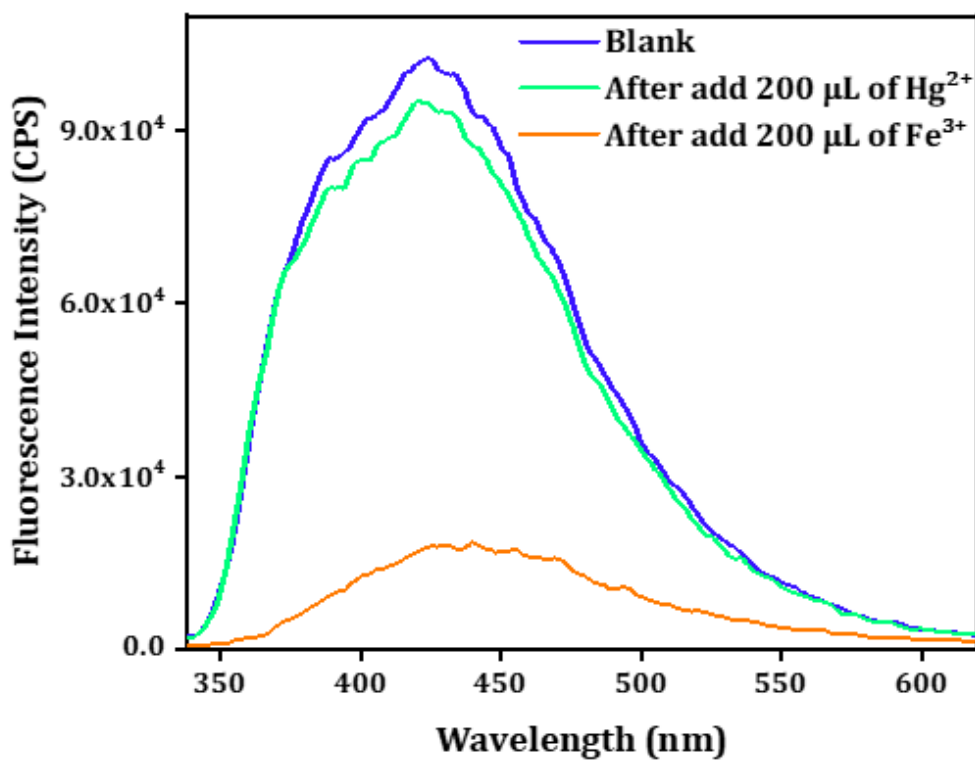

**Figure S17d:** Quenching behaviour of Zr-CPG xerogel characteristic peak after adding 10 mM solution of Hg<sup>2+</sup> followed by Fe<sup>3+</sup> in water.

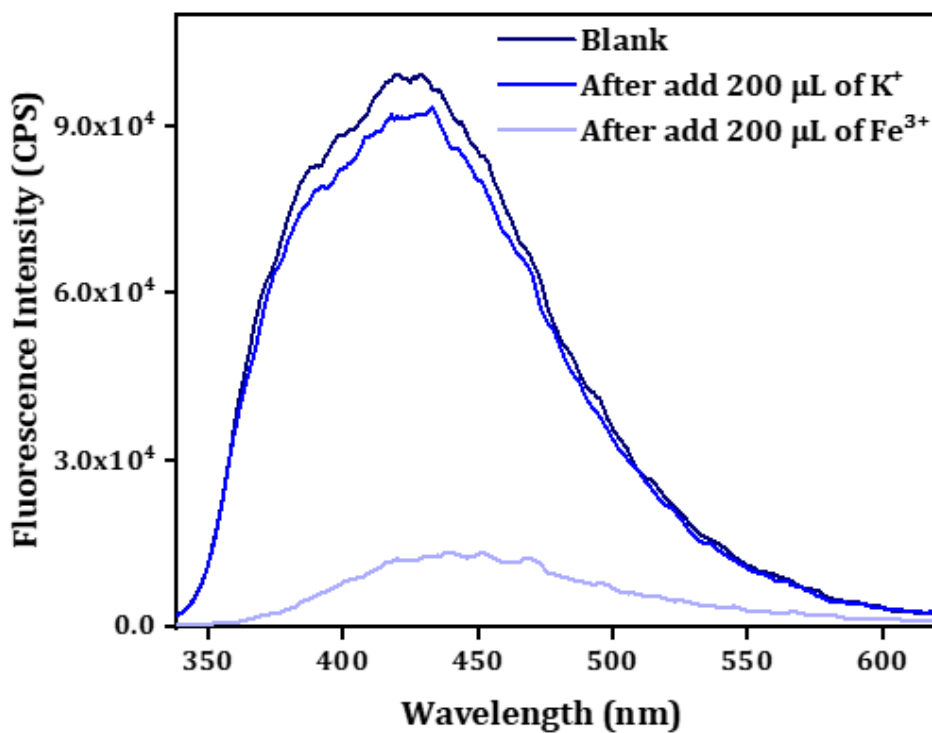

**Figure S17e:** Quenching behaviour of Zr-CPG xerogel characteristic peak after adding 10 mM solution of K<sup>+</sup> followed by Fe<sup>3+</sup> in water.

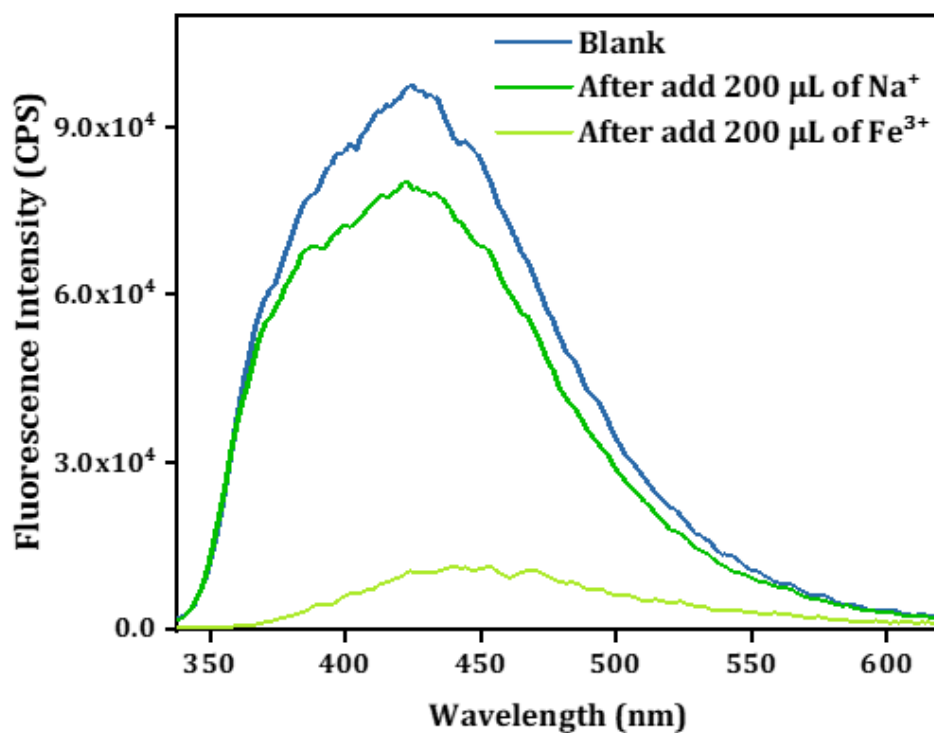

**Figure S17f:** Quenching behaviour of Zr-CPG xerogel characteristic peak after adding 10 mM solution of Na<sup>+</sup> followed by Fe<sup>3+</sup> in water.

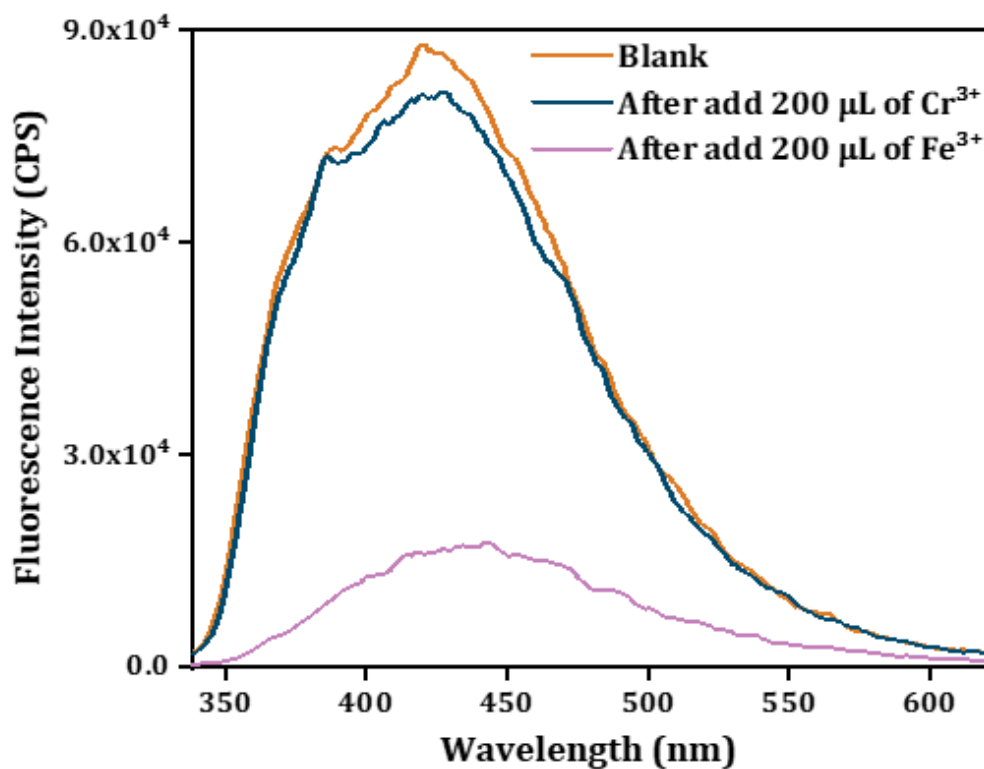

**Figure S17g:** Quenching behaviour of Zr-CPG xerogel characteristic peak after adding 10 mM solution of Cr<sup>3+</sup> followed by Fe<sup>3+</sup> in water.

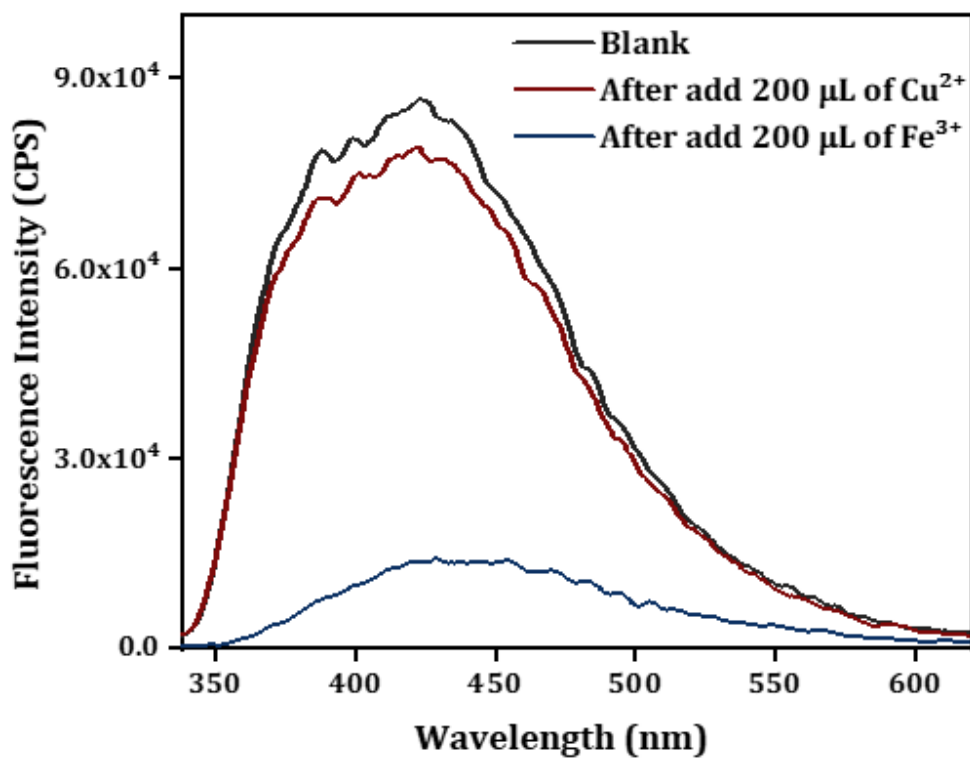

**Figure S17h:** Quenching behaviour of Zr-CPG xerogel characteristic peak after adding 10 mM solution of Cu<sup>2+</sup> followed by Fe<sup>3+</sup> in water.

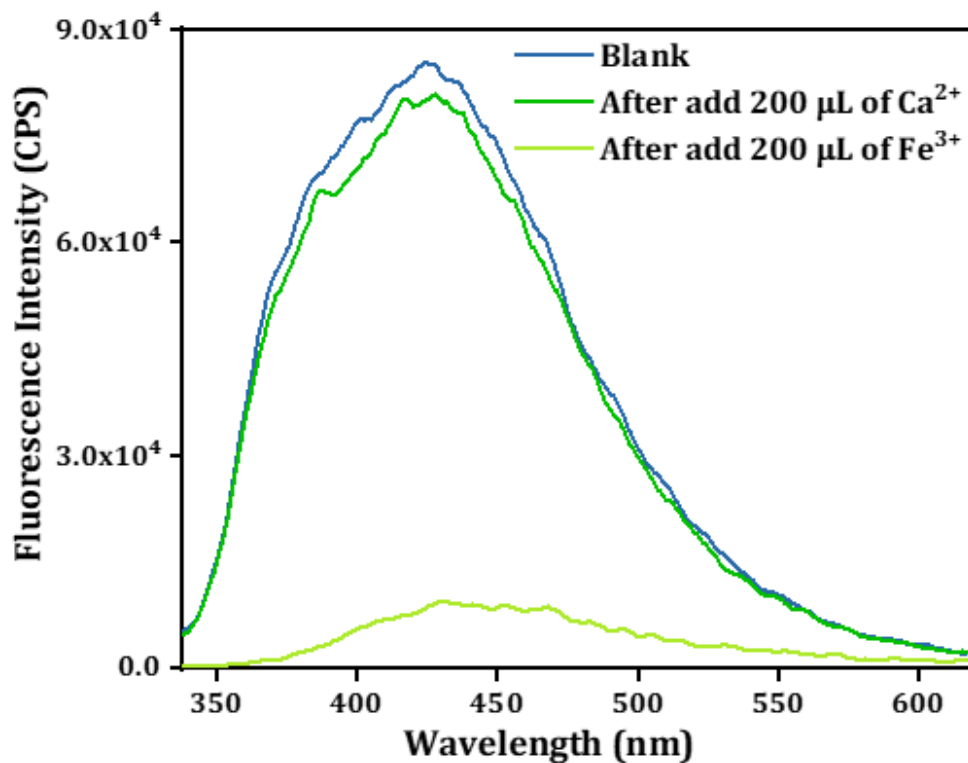

**Figure S17i:** Quenching behaviour of Zr-CPG xerogel characteristic peak after adding 10 mM solution of Ca<sup>2+</sup> followed by Fe<sup>3+</sup> in water.

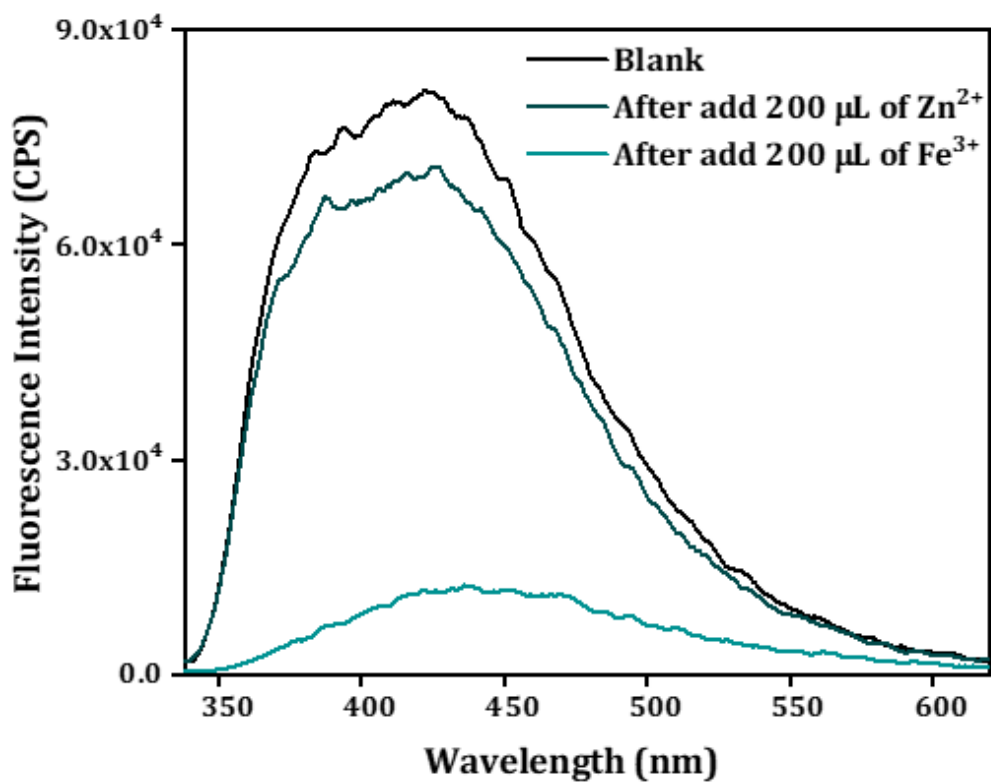

**Figure S17j:** Quenching behaviour of Zr-CPG xerogel characteristic peak after adding 10 mM solution of Zn<sup>2+</sup> followed by Fe<sup>3+</sup> in water.

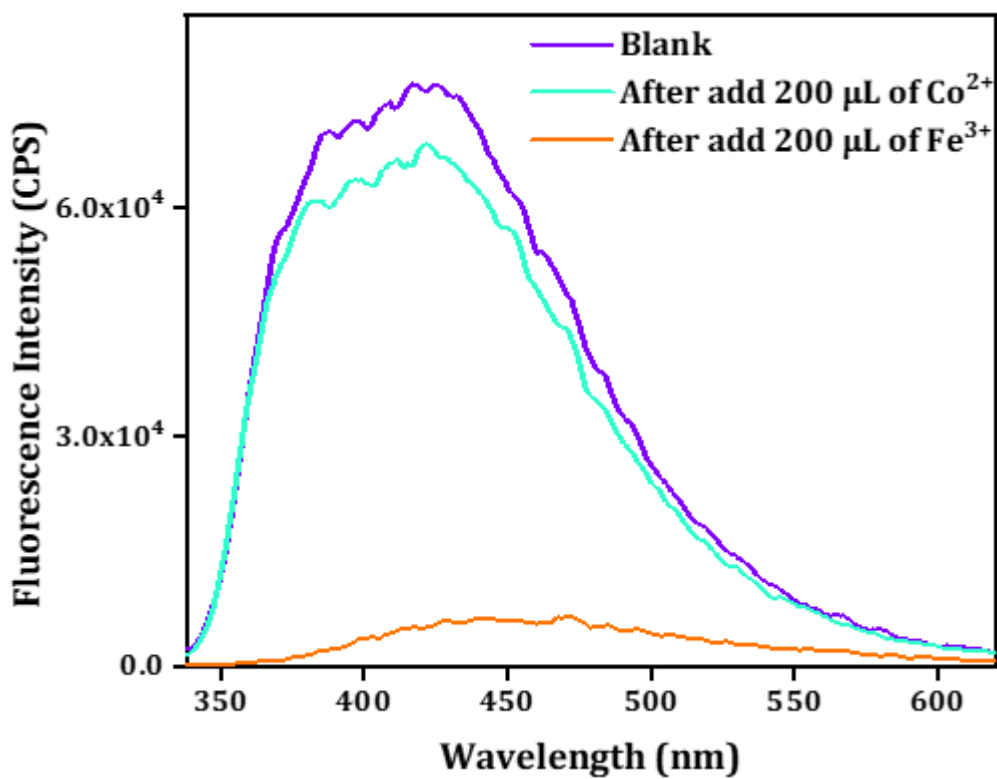

**Figure S17k:** Quenching behaviour of Zr-CPG xerogel characteristic peak after adding 10 mM solution of Co<sup>2+</sup> followed by Fe<sup>3+</sup> in water.



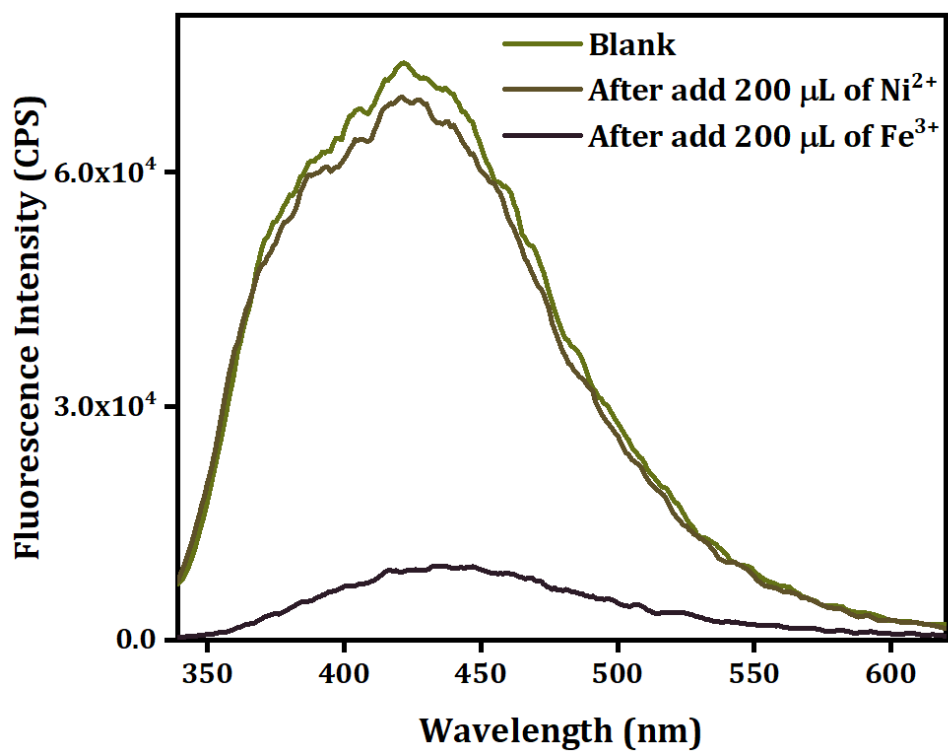

**Figure S17i:** Quenching behaviour of Zr-CPG xerogel characteristic peak after adding 10 mM solution of  $\text{Ni}^{2+}$  followed by  $\text{Fe}^{3+}$  in water.

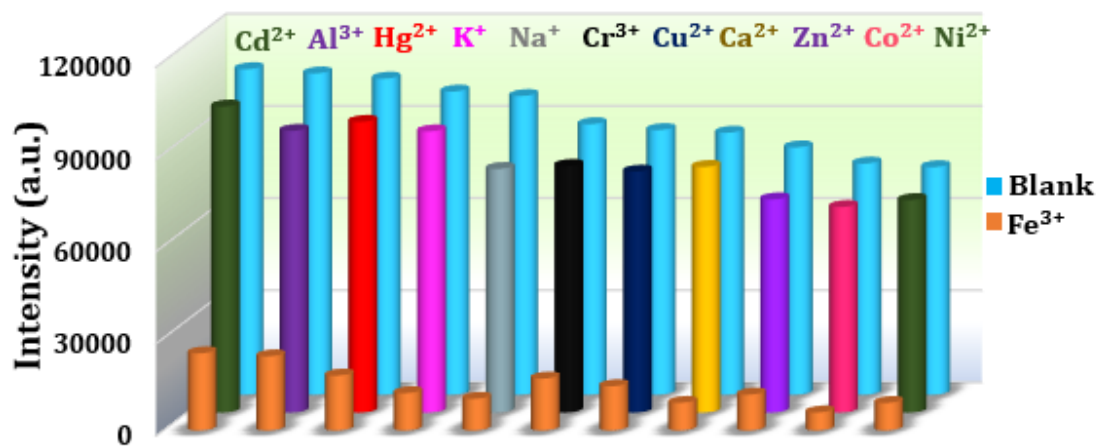

**Figure S18:** Bar diagram representation of  $\text{Fe}^{3+}$  quenching in presence of interfering ions.

**Recyclability test for Fe<sup>3+</sup> sensing:**

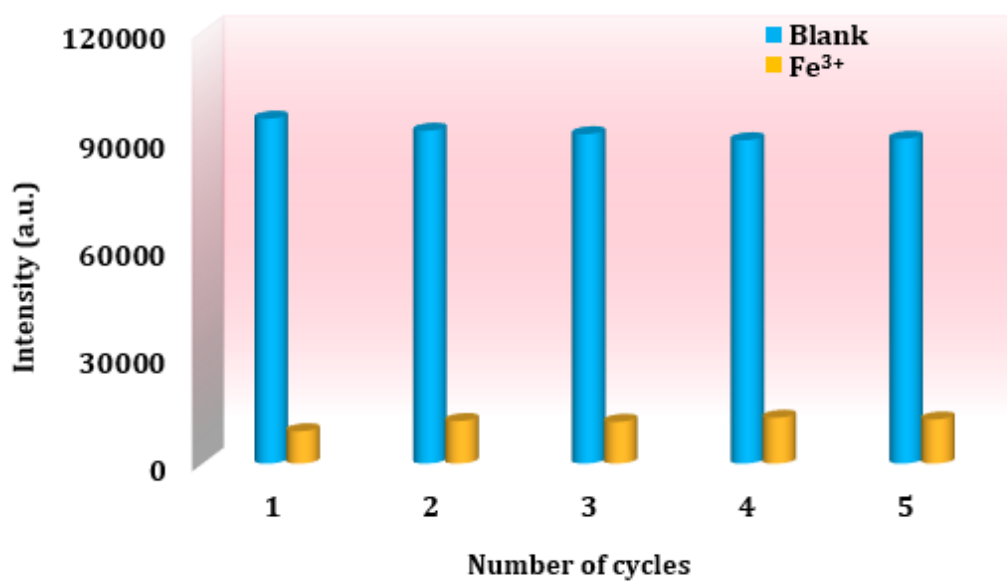

**Figure S19:** Recyclability of Fe<sup>3+</sup> sensing using Zr-CPG xerogel.

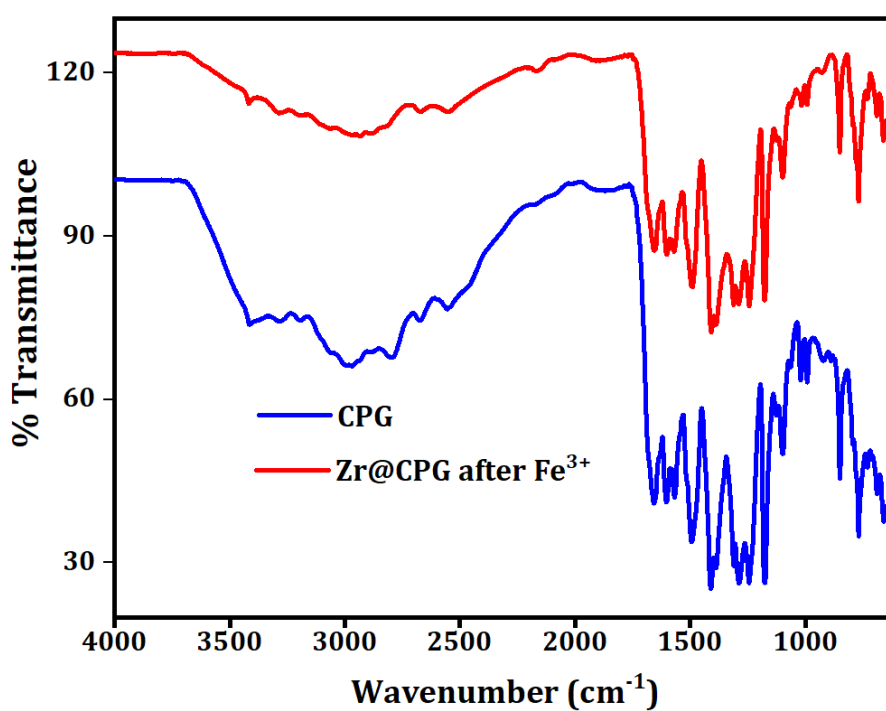

**Figure S20:** FT-IR spectra before and after completion of five cycles of NFT sensing.

**Fe<sup>3+</sup> sensing in physiological conditions:**

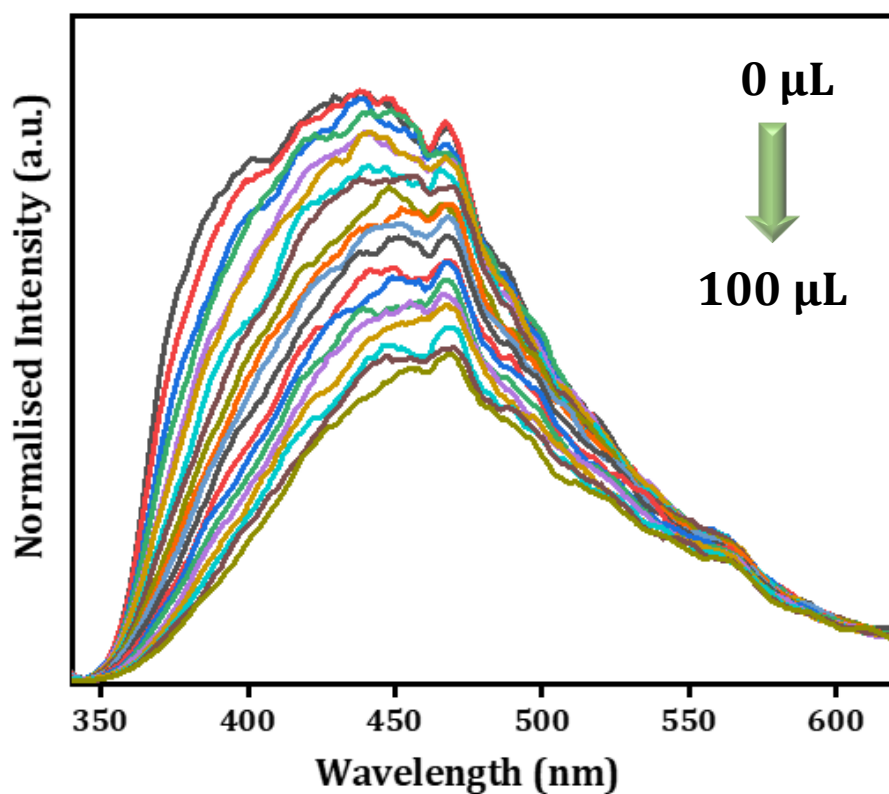

**Figure S21:** Quenching behaviour of Zr-CPG xerogel characteristic peak after adding 10 mM solution of NFT in physiological condition.

**Quenching behaviour of Zr-CPG's characteristic luminescent peak upon addition of different antibiotics (Figure S22a-S22h):**

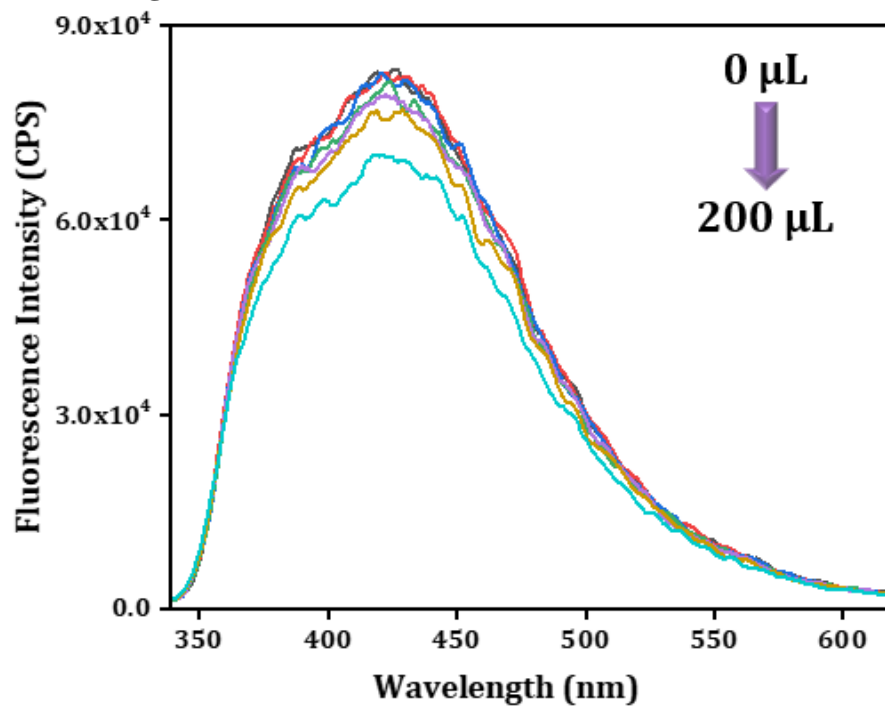

**Figure S22a:** Quenching of the luminescent peak of Zr-CPG xerogel upon addition of SDZ (10 mM, up to 200 μL).

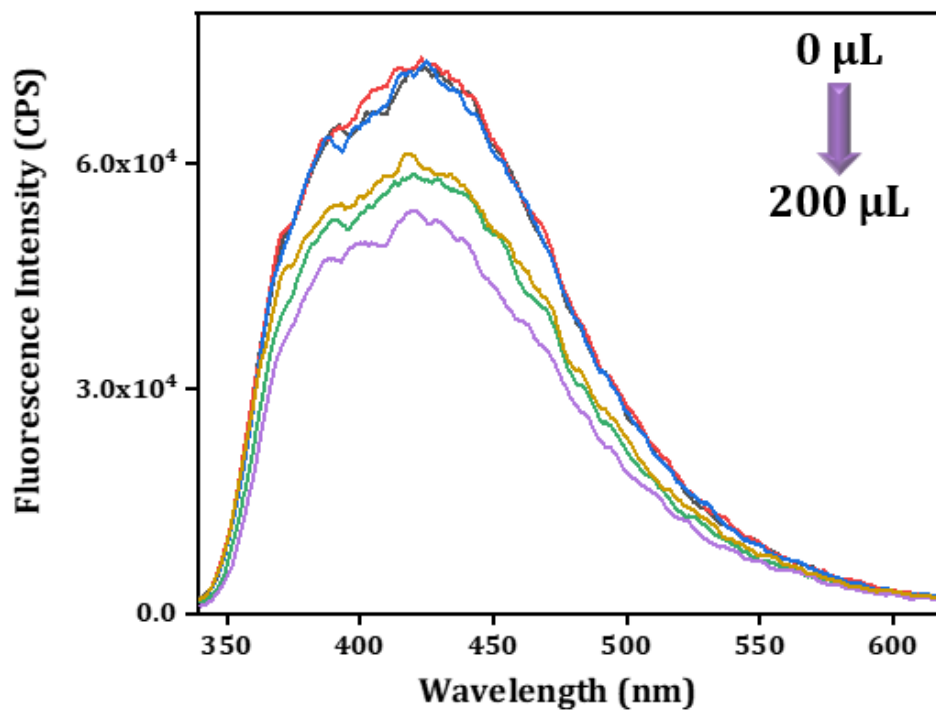

**Figure S22b:** Quenching of the luminescent peak of Zr-CPG xerogel upon addition of SMZ (10 mM, up to 200  $\mu\text{L}$ ).

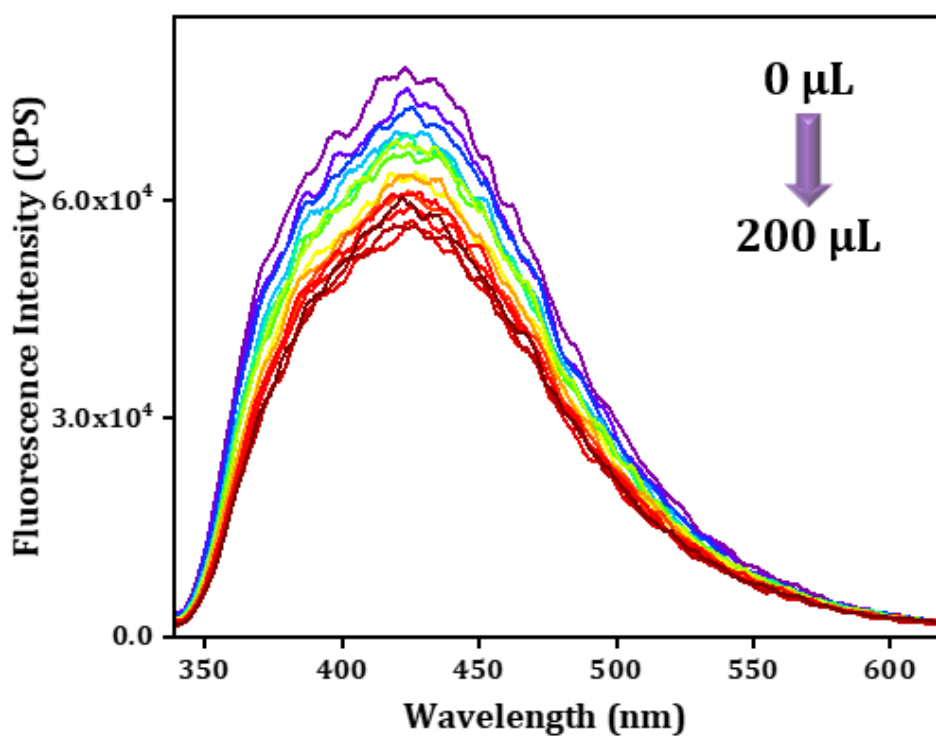

**Figure S22c:** Quenching of the luminescent peak of Zr-CPG xerogel upon addition of CAP (10 mM, up to 200  $\mu\text{L}$ ).

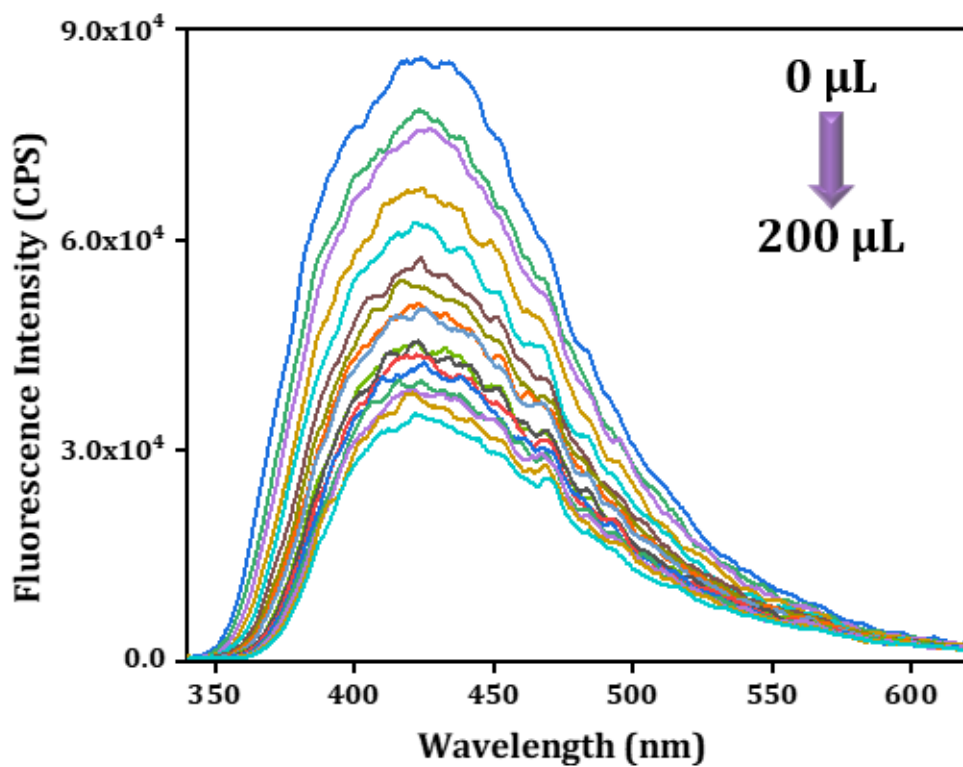

**Figure S22d:** Quenching of the luminescent peak of Zr-CPG xerogel upon addition of DTZ (10 mM, up to 200  $\mu\text{L}$ ).

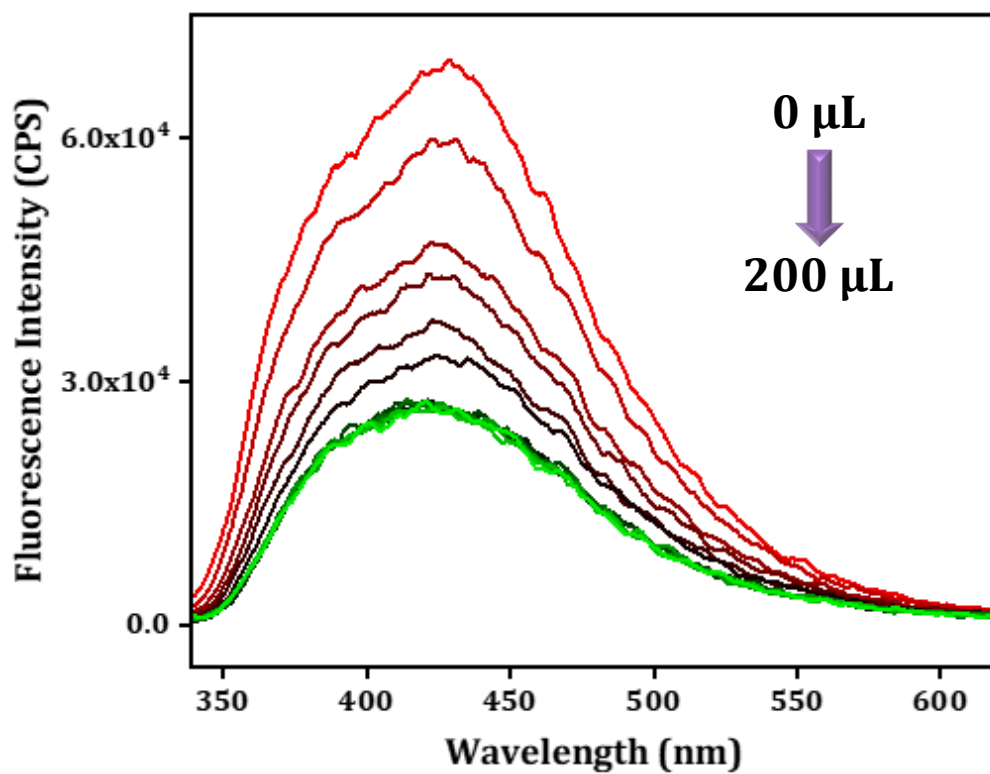

**Figure S22e:** Quenching of the luminescent peak of Zr-CPG xerogel upon addition of RDZ (10 mM, up to 200  $\mu\text{L}$ ).

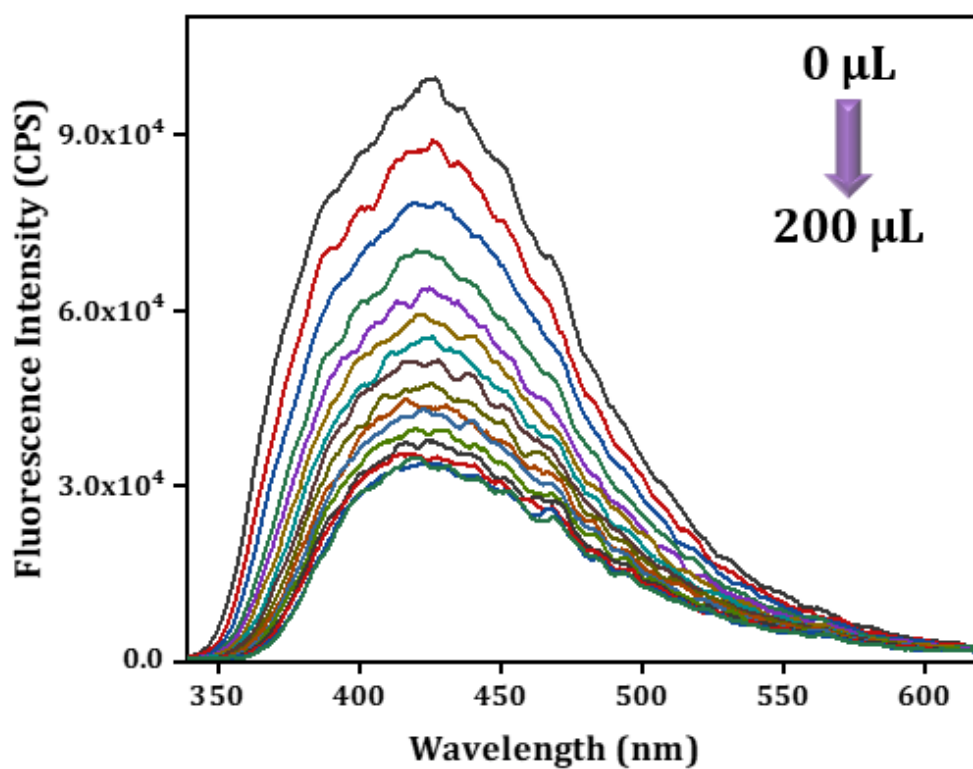

**Figure S22f:** Quenching of the luminescent peak of Zr-CPG xerogel upon addition of ODZ (10 mM, up to 200  $\mu\text{L}$ ).

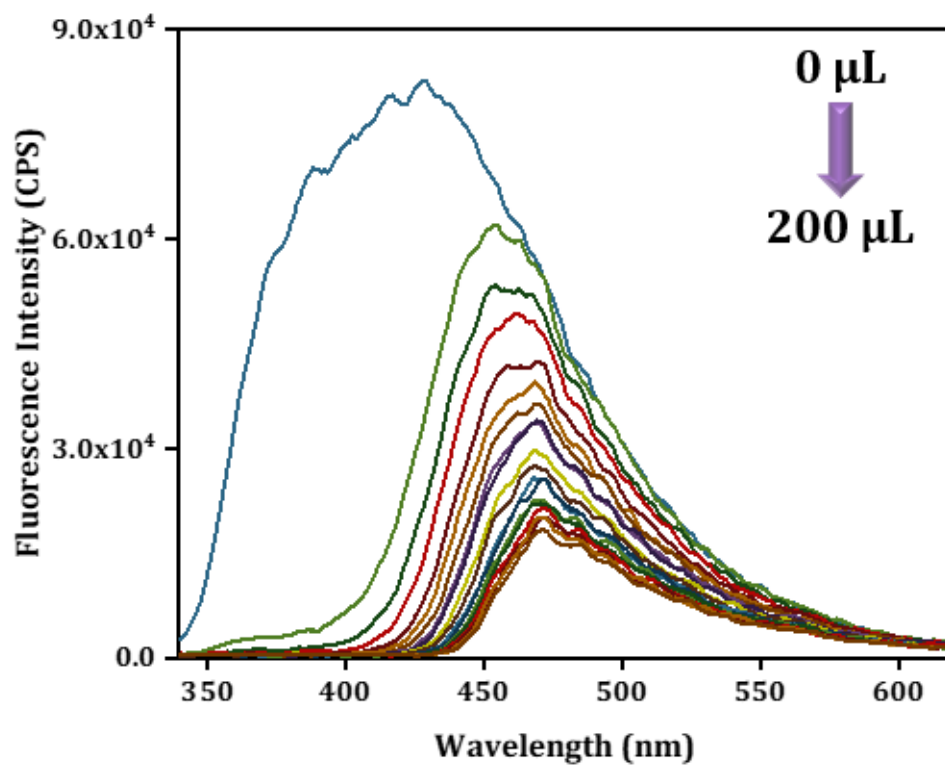

**Figure S22g:** Quenching of the luminescent peak of Zr-CPG xerogel upon addition of NFZ (10 mM, up to 200  $\mu\text{L}$ ).

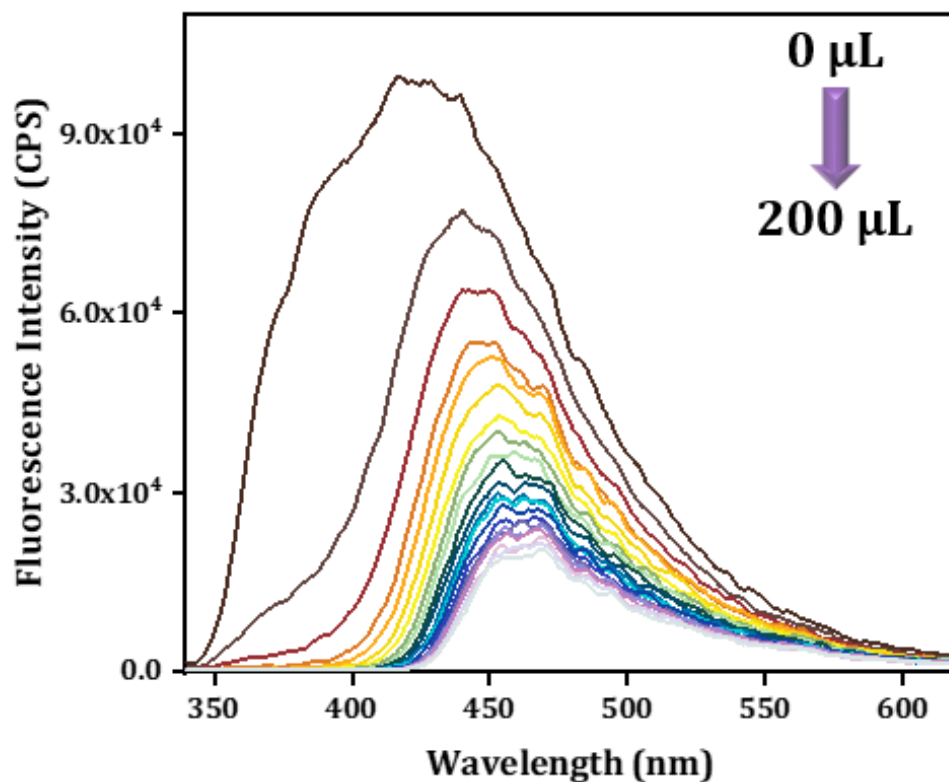

**Figure S22h:** Quenching of the luminescent peak of Zr-CPG xerogel upon addition of FZD (10 mM, up to 200  $\mu\text{L}$ ).

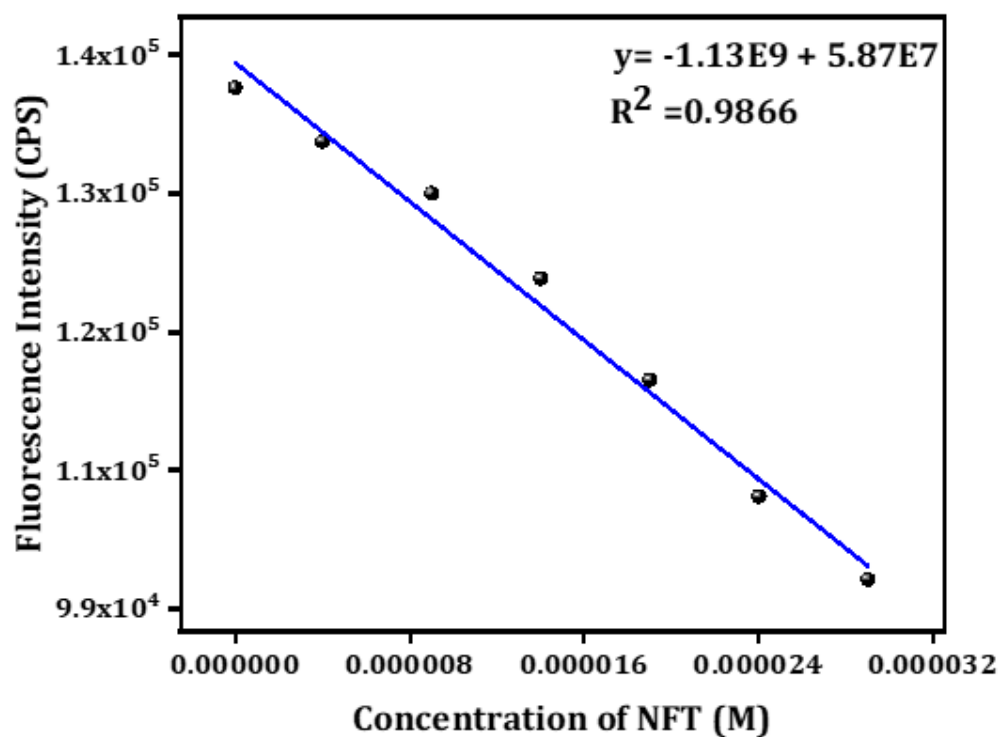

**Figure S23:** Fluorescence intensity changes of Zr-CPG xerogel with a function of NFT concentration.

**NFT sensing in presence of interference antibiotics (Figure S24a-S24f):**

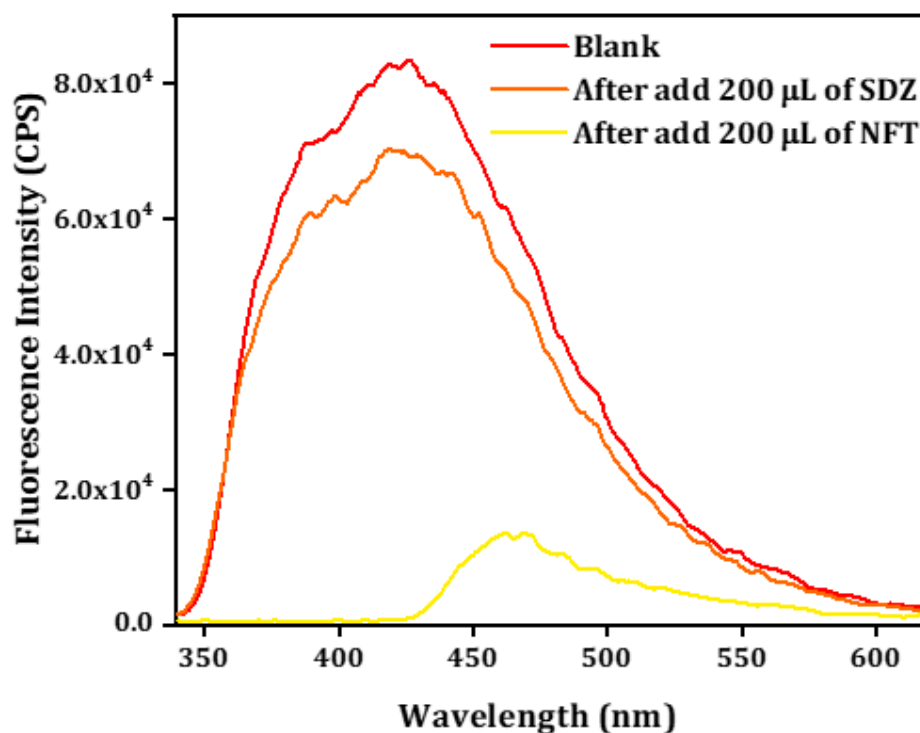

**Figure S24a:** Quenching behaviour of Zr-CPG xerogel characteristic peak after adding 10 mM solution of SDZ followed by NFT in water.

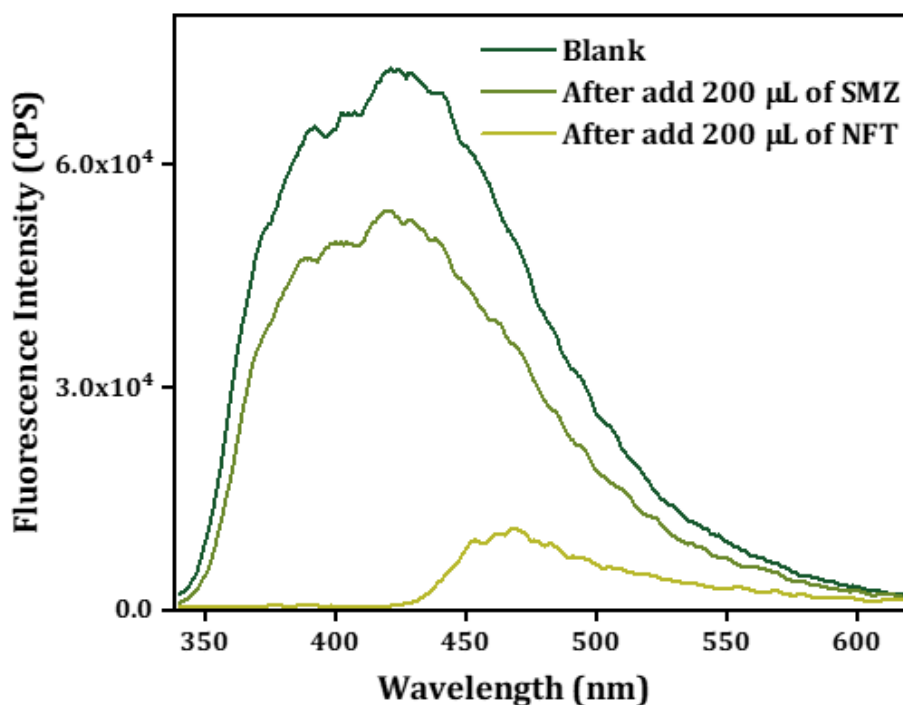

**Figure S24b:** Quenching behaviour of Zr-CPG xerogel characteristic peak after adding 10 mM solution of SMZ followed by NFT in water.



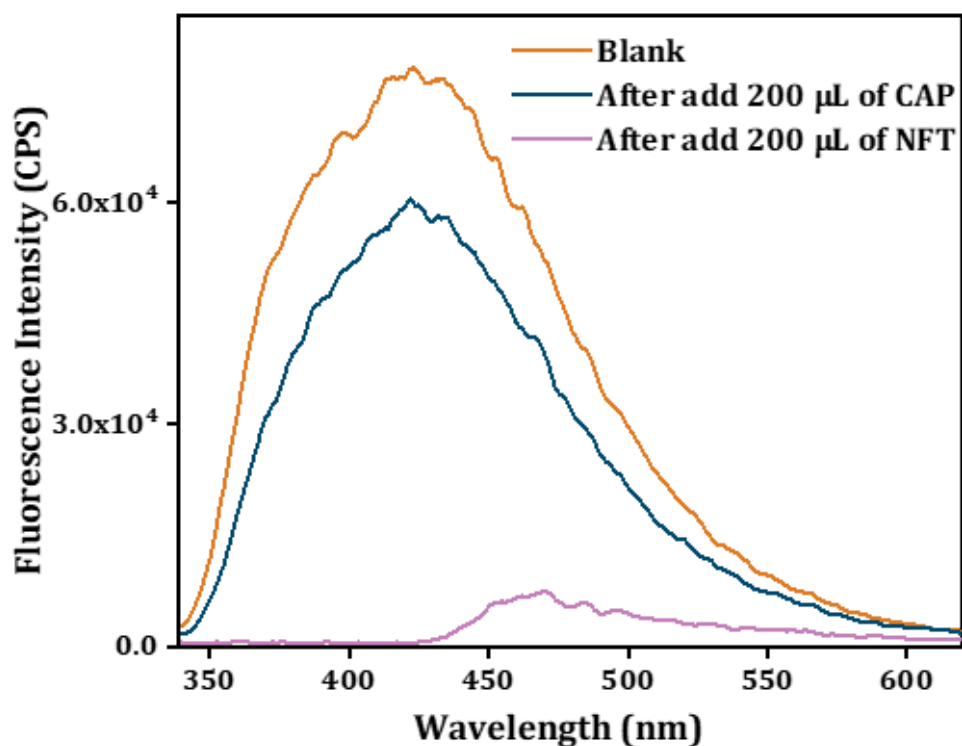

**Figure S24c:** Quenching behaviour of Zr-CPG xerogel characteristic peak after adding 10 mM solution of CAP followed by NFT in water.

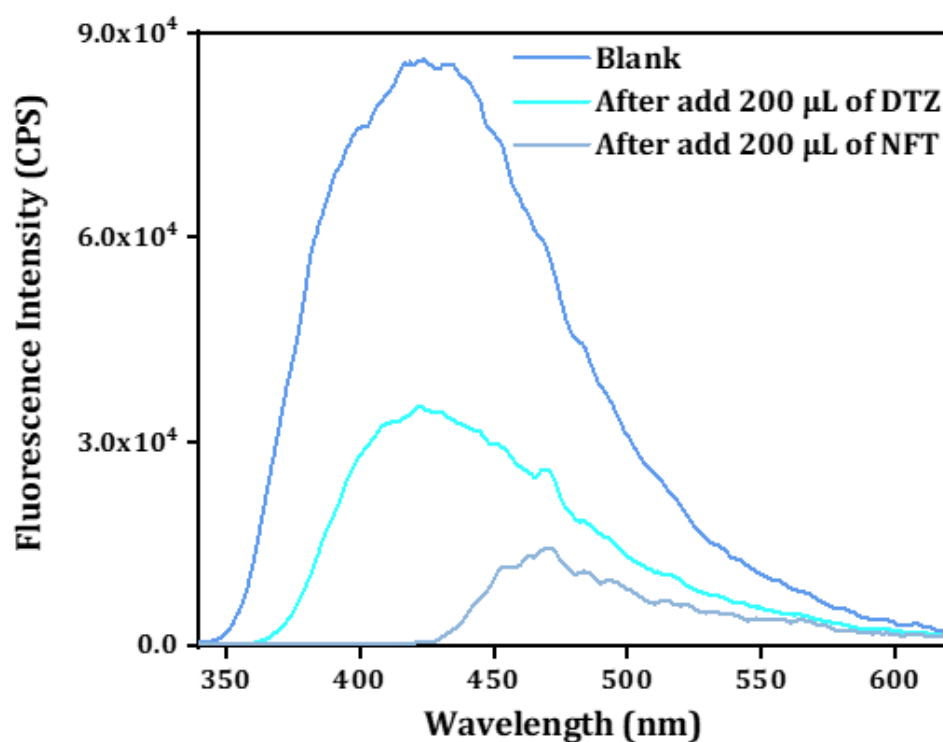

**Figure S24d:** Quenching behaviour of Zr-CPG xerogel characteristic peak after adding 10 mM solution of DTZ followed by NFT in water.

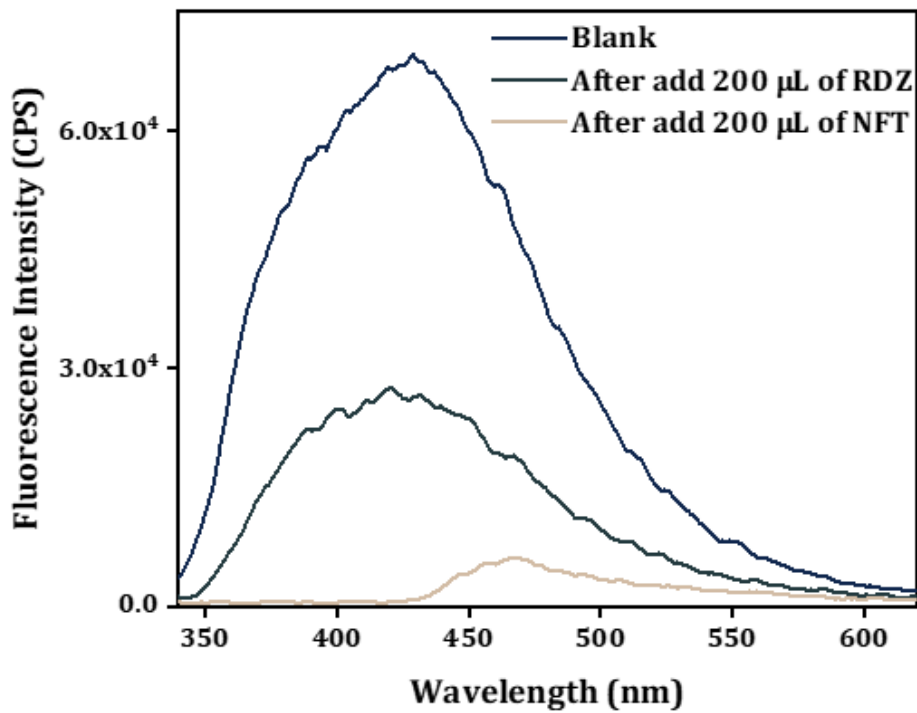

**Figure S24e:** Quenching behaviour of Zr-CPG xerogel characteristic peak after adding 10 mM solution of RDZ followed by NFT in water.

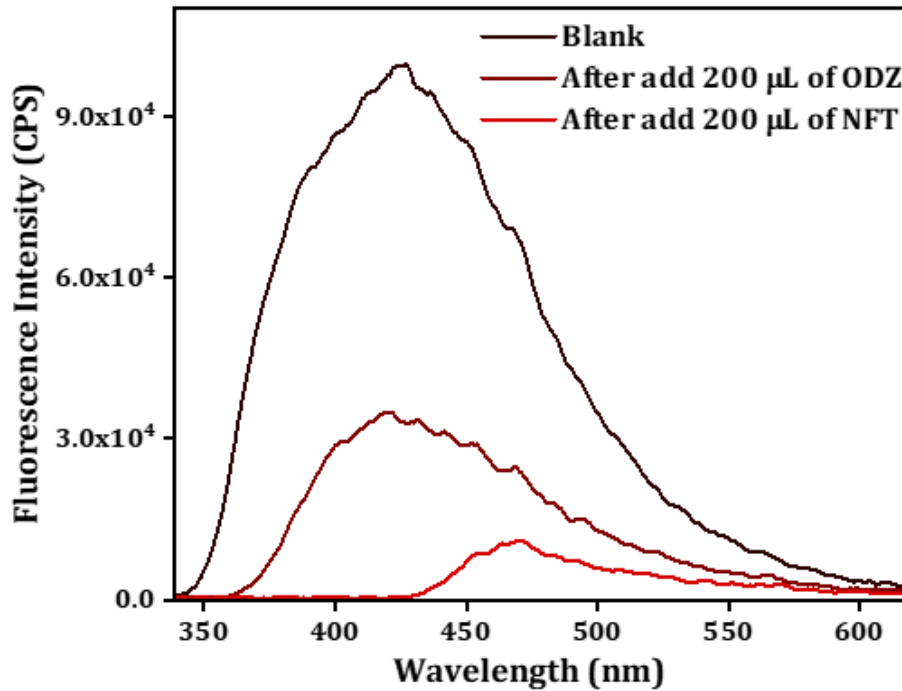

**Figure S24f:** Quenching behaviour of Zr-CPG xerogel characteristic peak after adding 10 mM solution of ODZ followed by NFT in water.

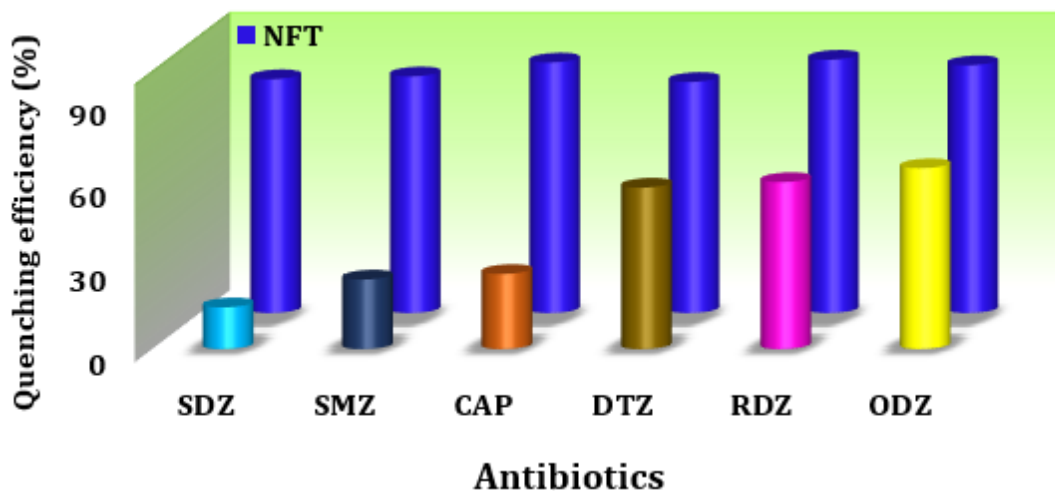

**Figure S25:** Quenching efficiency for NFT antibiotic in presence of other antibiotics (interference test).

**Recyclability test for NFT sensing:**

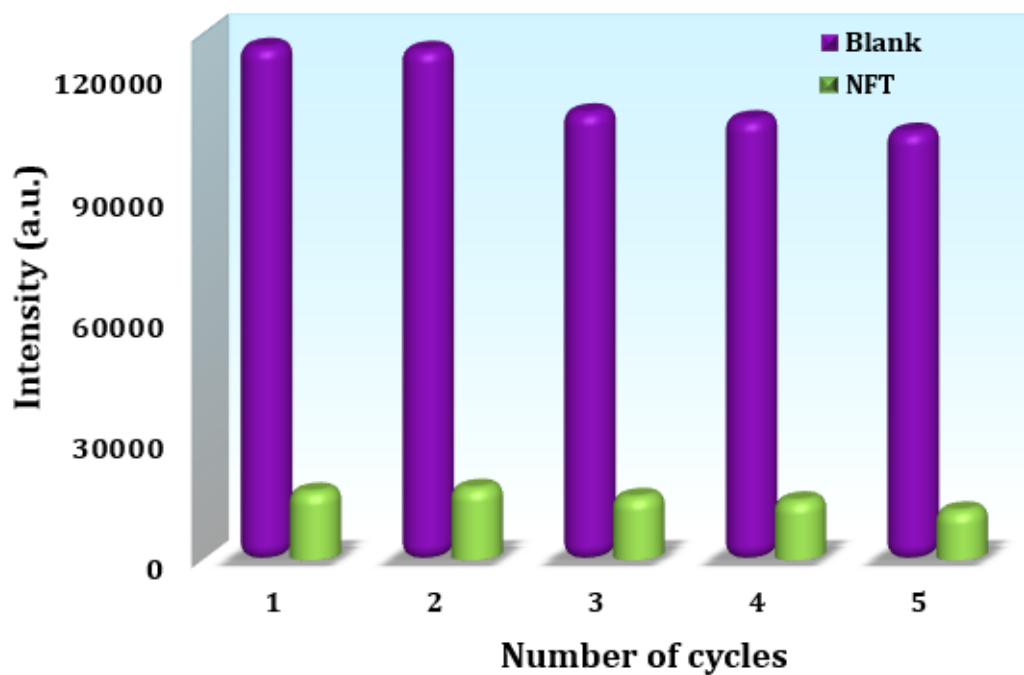

**Figure S26:** Recyclability of NFT sensing using Zr-CPG xerogel.

**Fluorescence kinetic study for NFT sensing:**

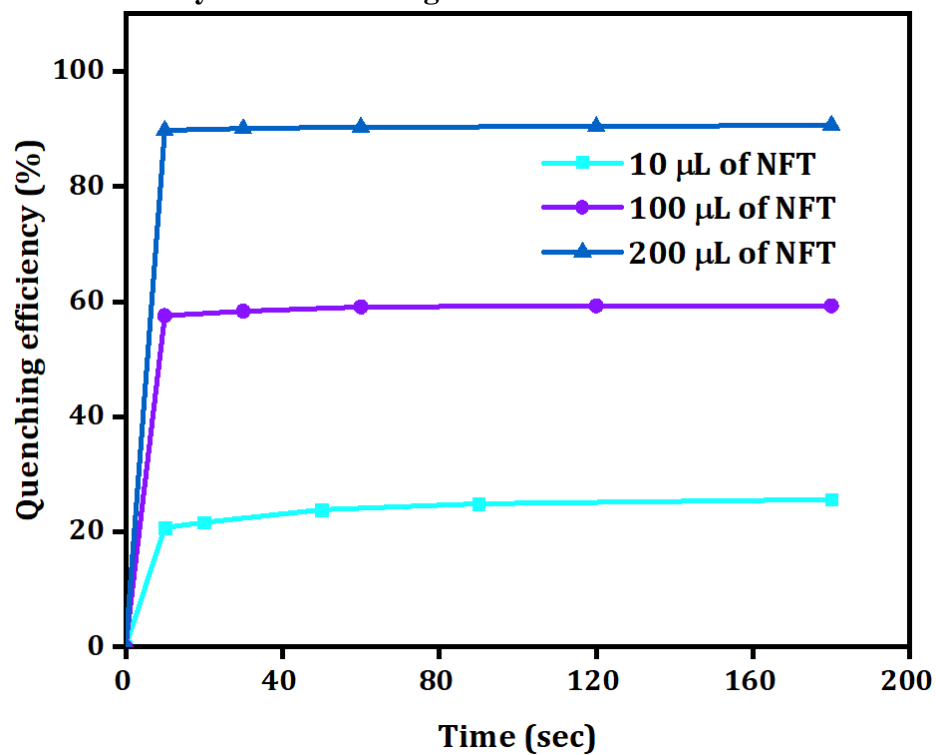

**Figure S27:** Kinetic study through fluorescence titration method for NFT sensing (variation in different volumes).

**Comparison table of Fe<sup>3+</sup> and NFT sensing for Zr-CPG xerogel with other reported materials:**

**Table S2:** Comparison table for Fe<sup>3+</sup> sensing of Zr-CPG xerogel with other reported materials.

| Sl No. | Sensor probe                                                                                                        | K <sub>sv</sub> Value (M <sup>-1</sup> ) | LOD value              | Medium        | Ref.             |
|--------|---------------------------------------------------------------------------------------------------------------------|------------------------------------------|------------------------|---------------|------------------|
| 1.     | Zr-CPG                                                                                                              | 7.16×10 <sup>3</sup>                     | 68 ppb                 | Water         | <b>This work</b> |
| 2.     | [Zn <sub>3</sub> (bpg) <sub>1.5</sub> (azdc) <sub>3</sub> ·(DMF) <sub>5.9</sub> ·(H <sub>2</sub> O) <sub>1.05</sub> | 2.54 × 10 <sup>4</sup>                   | 1.71 ppm               | DMF           | 1                |
| 3.     | [Tb(HL)(DMF)(H <sub>2</sub> O) <sub>2</sub> ].3H <sub>2</sub> O                                                     | 4.479×10 <sup>3</sup>                    | 1.03 ppm               | Water         | 2                |
| 4.     | Al-MIL-53-N <sub>3</sub>                                                                                            | 6.13 × 10 <sup>3</sup>                   | 0.03 μM                | Water         | 3                |
| 5.     | EuL <sub>3</sub>                                                                                                    | 4.1 × 10 <sup>3</sup>                    | 0.0005 mol/L           | Water         | 4                |
| 6.     | [Zn <sub>2</sub> (L1) <sub>2</sub> (HBPT) <sub>2</sub> ·H <sub>2</sub> O                                            | 3.38 × 10 <sup>4</sup>                   | 72 ppb                 | DMF           | 5                |
| 7.     | Au NRs                                                                                                              | -                                        | 100 ppb                | Water         | 6                |
| 8.     | AuNCs                                                                                                               | -                                        | 3.5 μM                 | Water         | 7                |
| 9.     | [Cd( <i>p</i> -CNPhHIDC)(4,4'-bipy) <sub>0.5</sub> ] <sub>n</sub>                                                   | 1.99 × 10 <sup>3</sup>                   | 5 × 10 <sup>-3</sup> M | Water         | 8                |
| 10.    | [Zn( <i>p</i> -CNPhHIDC)(4,4'-bipy)] <sub>n</sub>                                                                   | 1.37 × 10 <sup>3</sup>                   | 5 × 10 <sup>-3</sup> M | Water         |                  |
| 11.    | BTP-1                                                                                                               | -                                        | 0.74 nM                | Water         | 9                |
| 12.    | [Zn <sub>2</sub> (2,6-NDC) <sub>2</sub> (L).xG] <sub>n</sub>                                                        | -                                        | 0.052 ppm              | DMF/<br>Water | 10               |

**Table S3:** Comparison table for NFT sensing of Zr-CPG xerogel with other reported materials.

| Sl No. | Sensor probe                                     | K <sub>sv</sub> Value (M <sup>-1</sup> ) | LOD value | Medium                           | Ref.             |
|--------|--------------------------------------------------|------------------------------------------|-----------|----------------------------------|------------------|
| 1.     | Zr-CPG                                           | 1.53×10 <sup>4</sup>                     | 50 ppb    | Water                            | <b>This work</b> |
| 2.     | Copper nanoclusters                              | 4.3 × 10 <sup>3</sup>                    | 0.73 μM   | Phosphate buffer saline solution | 11               |
| 3.     | Tb-(TATMA)(H <sub>2</sub> O)·2H <sub>2</sub> O   | 3.35 × 10 <sup>4</sup>                   | -         | Water                            | 12               |
| 4.     | CTGU-8                                           | 9.25 × 10 <sup>5</sup>                   | 52 ppb    | Water                            | 13               |
| 5.     | Tb-AIP MMMs                                      | 4.0 × 10 <sup>4</sup>                    | 0.30 μM   | Water                            | 14               |
| 6.     | Eu-BCA thin-film                                 | 1.6 × 10 <sup>4</sup>                    | 0.21 μM   | Water                            | 15               |
| 7.     | [Zn(IPT) <sub>2</sub> ] <sub>n</sub>             | 1.4 × 10 <sup>4</sup>                    | -         | Water                            | 16               |
| 8.     | [Cd(tptc) <sub>0.5</sub> (bpy)] <sub>n</sub>     | 7.63 × 10 <sup>3</sup>                   | 184 ppb   | Water                            | 17               |
| 9.     | Zn(L)(aip)·(H <sub>2</sub> O)                    | -                                        | 100 ppm   | Water                            | 18               |
| 10.    | Zn(L)(ip)·(DMF)(H <sub>2</sub> O) <sub>1.5</sub> | -                                        | 80 ppm    | Water                            |                  |
| 11.    | Zn(L)(HBTC)·(H <sub>2</sub> O) <sub>2</sub>      | -                                        | 45 ppm    | Water                            |                  |

### Fluorescence quenching mechanism explanation:

**Table S4:** Average excited-state lifetime ( $\langle\tau\rangle$ ) values of pristine Zr-CPG after the addition of 10 mM aqueous solution of  $\text{Fe}^{3+}$  ion and NFT.

|                                                        | <b>B<sub>1</sub> (%)</b> | <b>B<sub>2</sub> (%)</b> | <b><math>\tau_1</math> (ns)</b> | <b><math>\tau_2</math> (ns)</b> | <b><math>\chi^2</math></b> | <b><math>\tau</math> (ns)</b> |
|--------------------------------------------------------|--------------------------|--------------------------|---------------------------------|---------------------------------|----------------------------|-------------------------------|
| <b>Zr-CPG</b>                                          | 45.89                    | 54.11                    | 0.69                            | 2.76                            | 1.04                       | 2.40                          |
| <b>Zr-CPG after adding <math>\text{Fe}^{3+}</math></b> | 37.41                    | 62.59                    | 0.41                            | 2.12                            | 1.13                       | 1.94                          |
| <b>Zr-CPG after adding NFT</b>                         | 36.34                    | 66.66                    | 0.47                            | 2.40                            | 1.17                       | 2.20                          |

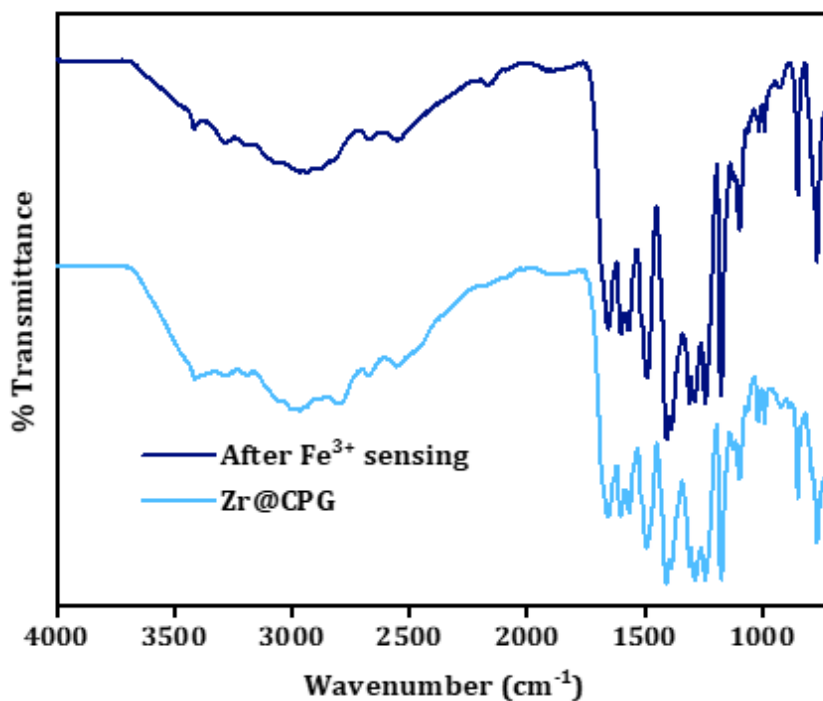

**Figure S28:** FT-IR spectra of Zr-CPG xerogel before and after  $\text{Fe}^{3+}$  sensing.

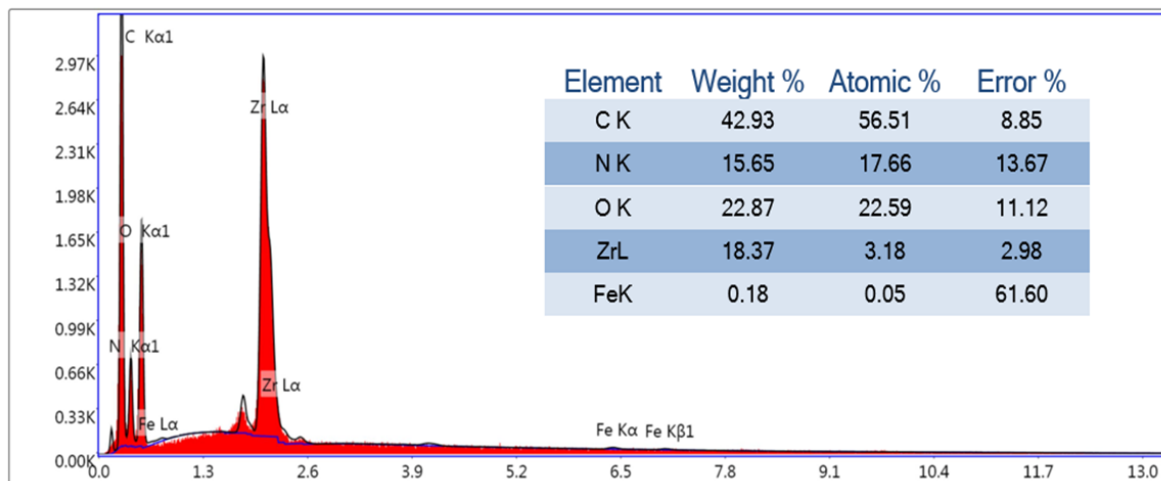

**Figure S29:** EDS analysis of Zr-CPG xerogel after NFT sensing.

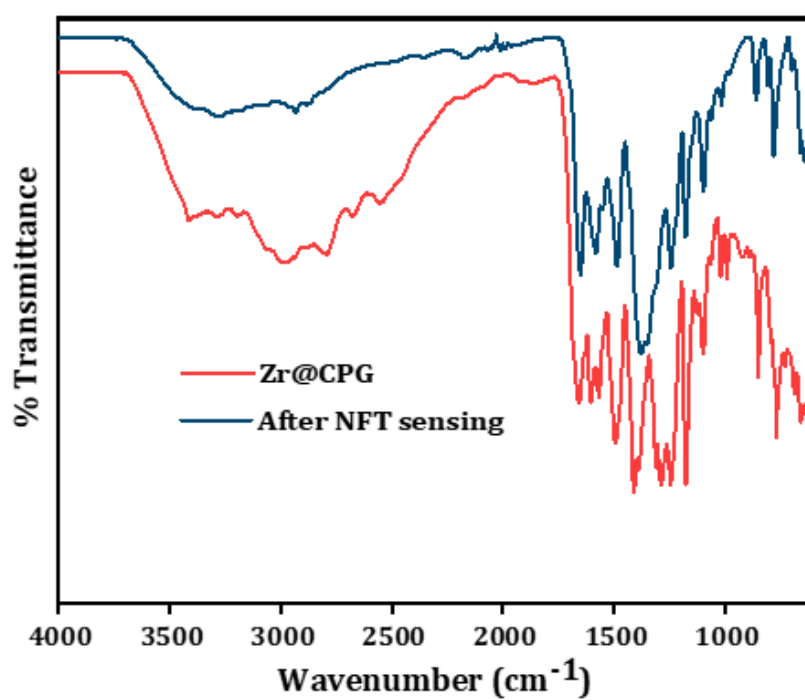

**Figure S30:** FT-IR spectra of Zr-CPG xerogel before and after NFT sensing.

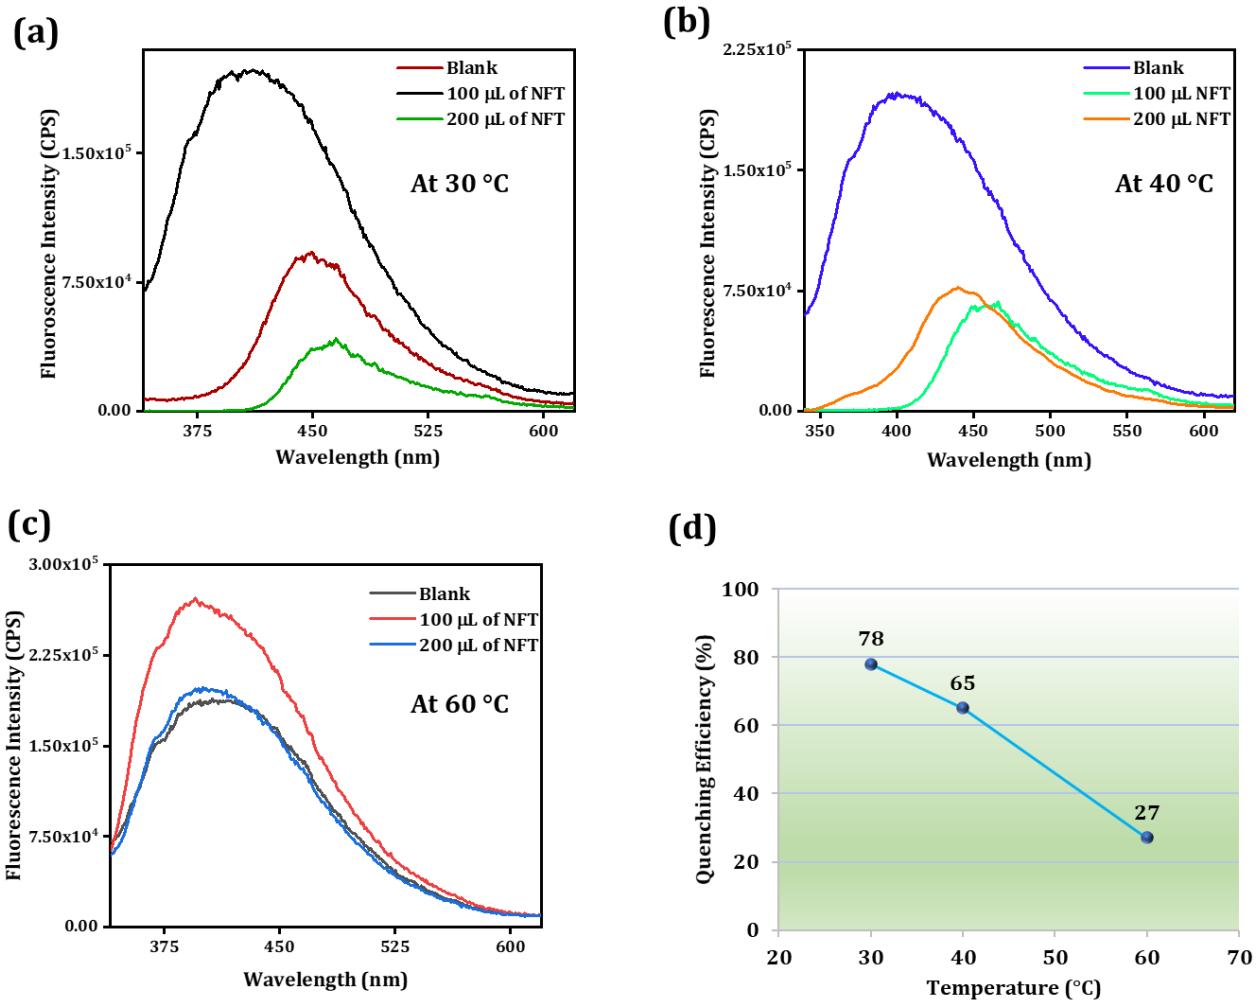

**Figure S31:** Temperature dependent quenching study (a-c), (d) corresponding line graph to dictate quenching efficiency.



### Optimized structure of linker and all antibiotics

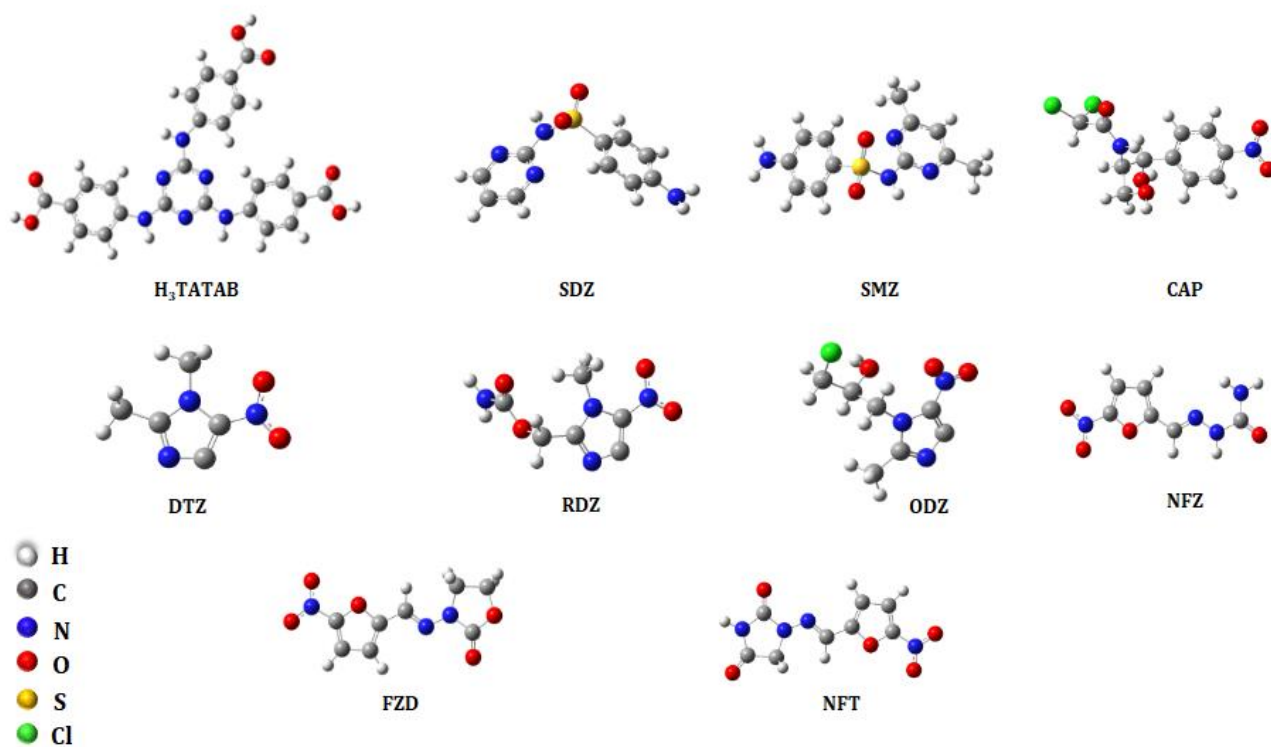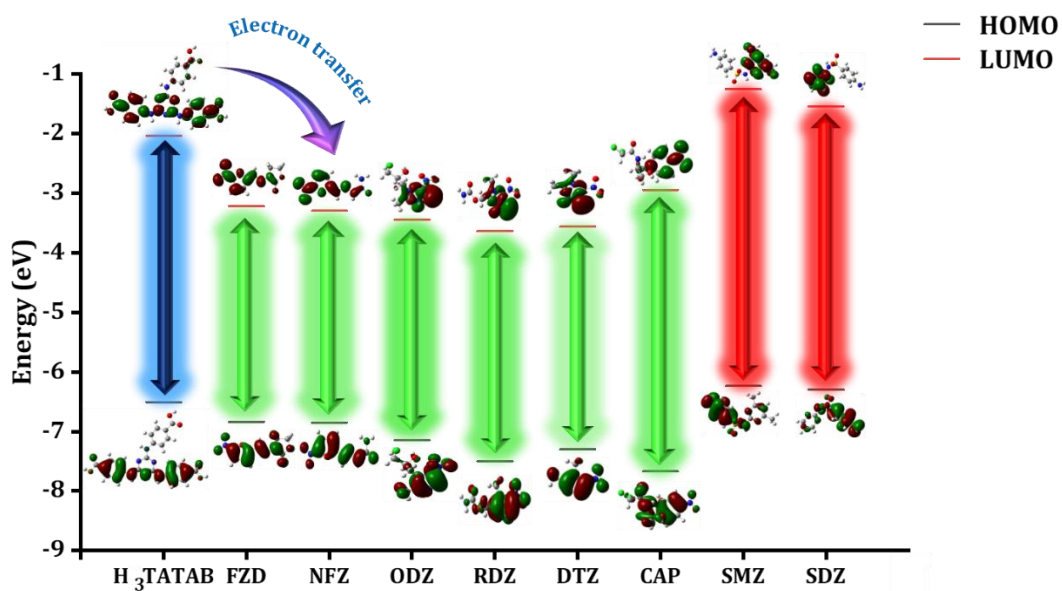

Figure S32: HOMO-LUMO energy levels of the linker (H<sub>3</sub>TATAB) and all antibiotics (except NFT).

**Table S5:** HOMO-LUMO energy levels of the linker (H<sub>3</sub>TATAB) and all antibiotics with calculated band gaps.

| Compound             | HUMO (eV) | LUMO (eV) | Band Gap (eV) |
|----------------------|-----------|-----------|---------------|
| H <sub>3</sub> TATAB | -6.51     | -2.04     | 4.47          |
| NFT                  | -6.99     | -3.34     | 3.65          |
| FZD                  | -6.84     | -3.22     | 3.62          |
| NFZ                  | -6.85     | -3.30     | 3.55          |
| ODZ                  | -7.14     | -3.45     | 3.69          |
| RDZ                  | -7.50     | -3.64     | 3.86          |
| DTZ                  | -7.30     | -3.56     | 3.74          |
| CAP                  | -7.67     | -2.95     | 4.72          |
| SMZ                  | -6.24     | -1.26     | 4.98          |
| SDZ                  | -6.30     | -1.55     | 4.75          |

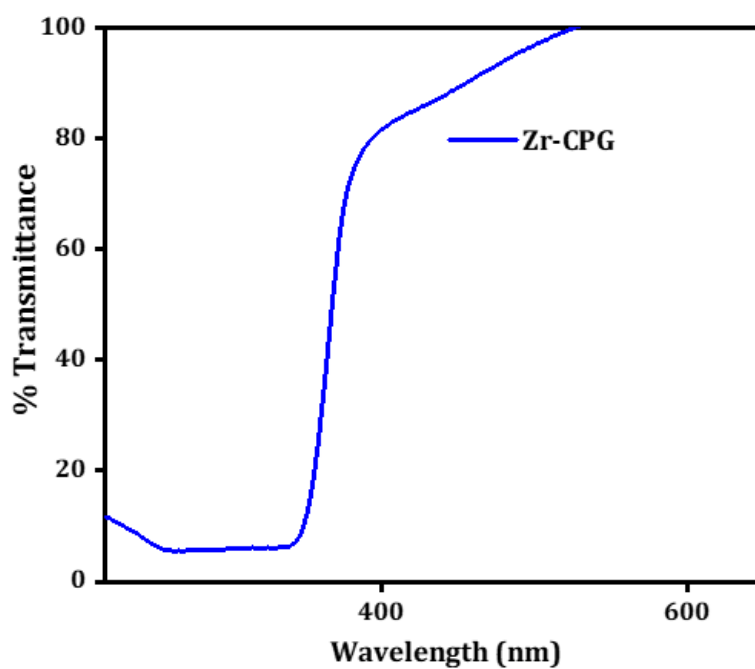

**Figure S33:** DRS spectra of Zr-CPG.

## Reference:

1. R. Goswami, S. C. Mandal, B. Pathak and S. Neogi, *ACS Appl. Mater. Interfaces*, 2019, **11**, 9042-9053.
2. S.-T. Zhang, J. Yang, H. Wu, Y.-Y. Liu and J.-F. Ma, *Chem. Eur. J.*, 2015, **21**, 15806-15819.
3. A. Das, S. Banesh, V. Trivedi and S. Biswas, *Dalton Trans.*, 2018, **47**, 2690-2700.
4. M. Zheng, H. Tan, Z. Xie, L. Zhang, X. Jing and Z. Sun, *ACS Appl. Mater. Interfaces*, 2013, **5**, 1078-1083.
5. Z.-Q. Liu, K. Chen, Y. Zhao, Y.-S. Kang, X.-H. Liu, Q.-Y. Lu, M. Azam, S. I. Al-Resayes and W.-Y. Sun, *Cryst. Growth Des.*, 2018, **18**, 1136-1146.
6. S. Thatai, P. Khurana, S. Prasad and D. Kumar, *Microchem. J.*, 2014, **113**, 77-82.
7. J.-a. Annie Ho, H.-C. Chang and W.-T. Su, *Anal. Chem.*, 2012, **84**, 3246-3253.
8. J. Zhang, L. Zhao, Y. Liu, M. Li, G. Li and X. Meng, *New J. Chem.*, 2018, **42**, 6839-6847.
9. J. Nandre, S. Patil, V. Patil, F. Yu, L. Chen, S. Sahoo, T. Prior, C. Redshaw, P. Mahulikar and U. Patil, *Biosens. Bioelectron.*, 2014, **61**, 612-617.
10. D. Mukherjee, A. Pal, S. C. Pal, A. Saha and M. C. Das, *Inorg. Chem.*, 2022, **61**, 16952-16962.
11. Z. Cai, S. Pang, L. Wu, E. Hao and J. Rong, *Spectrochim. Acta A Mol. Biomol. Spectrosc.*, 2021, **255**, 119737.
12. Q.-Q. Zhu, H. He, Y. Yan, J. Yuan, D.-Q. Lu, D.-Y. Zhang, F. Sun and G. Zhu, *Inorg. Chem.*, 2019, **58**, 7746-7753.
13. Z.-H. Zhou, W.-W. Dong, Y.-P. Wu, J. Zhao, D.-S. Li, T. Wu and X.-h. Bu, *Inorg. Chem.*, 2018, **57**, 3833-3839.
14. F. Zhang, H. Yao, Y. Zhao, X. Li, G. Zhang and Y. Yang, *Talanta*, 2017, **174**, 660-666.
15. F. Zhang, H. Yao, T. Chu, G. Zhang, Y. Wang and Y. Yang, *Chem. Eur. J.*, 2017, **23**, 10293-10300.
16. M. Liu and Y. Chi, *J. Fluoresc.*, 2020, **30**, 1035-1042.
17. L. Fan, F. Wang, D. Zhao, X. Sun, H. Chen, H. Wang and X. Zhang, *Spectrochim. Acta A Mol. Biomol. Spectrosc.* 2020, **239**, 118467.
18. Z. Zhou, M.-L. Han, H.-R. Fu, L.-F. Ma, F. Luo and D.-S. Li, *Dalton Trans.*, 2018, **47**, 5359-5365.
